# Supplementary material for: The KH domain facilitates the substrate specificity and unwinding processivity of DDX43 helicase
Source: PubMed Central journal article supplement (PMC7949032; doi:10.1074/jbc.ra120.015824), 2020-11-23
Supplement: mmc1.pdf [file mmc1.pdf]

**Table S1. Nucleic acids bound by KH domain**

| KH domain                      | GXXG sequence             | Specific nucleic acids bound by the KH domain (5'-3') | References |
|--------------------------------|---------------------------|-------------------------------------------------------|------------|
| Sam 68-KH                      | GPQG                      | UAAA                                                  | (1)        |
| Vigilin ( <i>X. laevis</i> )   | Vigilin has 14 KH domains | (A)nCU and CU(A)n                                     | (2)        |
| Vigilin ( <i>M. musculus</i> ) | Vigilin has 14 KH domains | CHHC or CHYC (H = A/C/U and Y = C/U)                  | (3)        |
| SF1-KH                         | GPRG                      | UACUAAC                                               | (4,5)      |
| QKI-KH                         | GPRG                      | YUAAAY(Y = C/U)                                       | (6)        |
|                                |                           | NACUAAAY-N(1-20)-UAAAY (Y = C/U)                      | (7)        |
| hnRNP K-KH3                    | GKGG                      | TCCC                                                  | (8,9)      |
| FBP-KH3                        | GRNG                      | TTTT                                                  | (8,9)      |
| FBP-KH4                        | GKGG                      | ATTC                                                  | (8,9)      |
| PCBP1-KH3                      | GRQG                      | CUCUCCUUUCUUUUUCUUCUCCUCCUA                           | (10)       |
| PCBP2-KH1                      | GKKG                      | C rich (CCCT or ACCC)                                 | (11)       |
| PCBP2-KH3                      | GRQG                      | CCCT                                                  | (12)       |
| Nova-2-KH3                     | GKGG                      | UCAC                                                  | (13)       |
| NusA: KH1-KH2                  | GMRG (KH1);<br>GRNG (KH2) | GAACUCAAUAG                                           | (14)       |
| KSRP-KH1                       | GRGG                      | UAUUUA                                                | (15)       |
| KSRP-KH2                       | GKGG                      | UAUUUA                                                | (15)       |
| KSRP-KH3                       | GRSG                      | UAUUUA                                                | (15)       |
|                                |                           | AGGGU                                                 | (16-18)    |
| KSRP-KH4                       | GRGG                      | UAUUUA                                                | (15)       |

## References:

- Lin, Q., Taylor, S.J. and Shalloway, D. (1997) Specificity and determinants of Sam68 RNA binding. Implications for the biological function of K homology domains. *J. Biol. Chem.*, **272**, 27274-27280.
- Kanamori, H., Dodson, R.E. and Shapiro, D.J. (1998) In vitro genetic analysis of the RNA binding site of vigilin, a multi-KH-domain protein. *Mol Cell Biol*, **18**, 3991-4003.
- Mobin, M.B., Gerstberger, S., Teupser, D., Campana, B., Charisse, K., Heim, M.H., Manoharan, M., Tuschl, T. and Stoffel, M. (2016) The RNA-binding protein vigilin regulates VLDL secretion through modulation of Apob mRNA translation. *Nature communications*, **7**, 12848.
- Liu, Z., Luyten, I., Bottomley, M.J., Messias, A.C., Houngrinou-Molango, S., Sprangers, R., Zanier, K., Kramer, A. and Sattler, M. (2001) Structural basis for recognition of the intron branch site RNA by splicing factor 1. *Science*, **294**, 1098-1102.
- Berglund, J.A., Chua, K., Abovich, N., Reed, R. and Rosbash, M. (1997) The splicing factor BBP interacts specifically with the pre-mRNA branchpoint sequence UACUAAC. *Cell*, **89**, 781-787.
- Teplova, M., Hafner, M., Teplov, D., Essig, K., Tuschl, T. and Patel, D.J. (2013) Structure-function studies of STAR family Quaking proteins bound to their in vivo RNA target sites. *Genes Dev*, **27**, 928-940.
- Galarneau, A. and Richard, S. (2005) Target RNA motif and target mRNAs of the Quaking STAR protein. *Nature structural & molecular biology*, **12**, 691-698.
- Braddock, D.T., Baber, J.L., Levens, D. and Clore, G.M. (2002) Molecular basis of sequence-specific single-stranded DNA recognition by KH domains: solution structure of a complex between hnRNP K KH3 and single-stranded DNA. *Embo j*, **21**, 3476-3485.
- Braddock, D.T., Louis, J.M., Baber, J.L., Levens, D. and Clore, G.M. (2002) Structure and dynamics of KH domains from FBP bound to single-stranded DNA.

- 
- Nature*, **415**, 1051-1056.
10. Sidiqi, M., Wilce, J.A., Vivian, J.P., Porter, C.J., Barker, A., Leedman, P.J. and Wilce, M.C. (2005) Structure and RNA binding of the third KH domain of poly(C)-binding protein 1. *Nucleic Acids Res*, **33**, 1213-1221.
  11. Du, Z., Lee, J.K., Fenn, S., Tjhen, R., Stroud, R.M. and James, T.L. (2007) X-ray crystallographic and NMR studies of protein-protein and protein-nucleic acid interactions involving the KH domains from human poly(C)-binding protein-2. *Rna*, **13**, 1043-1051.
  12. Fenn, S., Du, Z., Lee, J.K., Tjhen, R., Stroud, R.M. and James, T.L. (2007) Crystal structure of the third KH domain of human poly(C)-binding protein-2 in complex with a C-rich strand of human telomeric DNA at 1.6 Å resolution. *Nucleic Acids Res*, **35**, 2651-2660.
  13. Lewis, H.A., Musunuru, K., Jensen, K.B., Edo, C., Chen, H., Darnell, R.B. and Burley, S.K. (2000) Sequence-specific RNA binding by a Nova KH domain: implications for paraneoplastic disease and the fragile X syndrome. *Cell*, **100**, 323-332.
  14. Beuth, B., Pennell, S., Arnvig, K.B., Martin, S.R. and Taylor, I.A. (2005) Structure of a Mycobacterium tuberculosis NusA-RNA complex. *Embo j*, **24**, 3576-3587.
  15. Hollingworth, D., Candel, A.M., Nicastro, G., Martin, S.R., Briata, P., Gherzi, R. and Ramos, A. (2012) KH domains with impaired nucleic acid binding as a tool for functional analysis. *Nucleic Acids Res*, **40**, 6873-6886.
  16. Trabucchi, M., Briata, P., Garcia-Mayoral, M., Haase, A.D., Filipowicz, W., Ramos, A., Gherzi, R. and Rosenfeld, M.G. (2009) The RNA-binding protein KSRP promotes the biogenesis of a subset of microRNAs. *Nature*, **459**, 1010-1014.
  17. Garcia-Mayoral, M.F., Diaz-Moreno, I., Hollingworth, D. and Ramos, A. (2008) The sequence selectivity of KSRP explains its flexibility in the recognition of the RNA targets. *Nucleic Acids Res*, **36**, 5290-5296.
  18. Nicastro, G., Garcia-Mayoral, M.F., Hollingworth, D., Kelly, G., Martin, S.R., Briata, P., Gherzi, R. and Ramos, A. (2012) Noncanonical G recognition mediates KSRP regulation of let-7 biogenesis. *Nature structural & molecular biology*, **19**, 1282-1286.

**Table S2. DNA and RNA substrates and oligonucleotides used in this study**

| Substrate name                        | Structure or description                                                            | Nucleotide sequence (5'→3')                                                                                                                          |
|---------------------------------------|-------------------------------------------------------------------------------------|------------------------------------------------------------------------------------------------------------------------------------------------------|
| ssDNA (30 mer)                        | Used as random sequence ssDNA in EMSA                                               | DNA 30 mer: GAGCTACCAGCTACCCCGTATGTCAGAGAG                                                                                                           |
| Fork dsDNA (30 bp)                    | 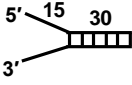   | Fork 30/15-T:<br>TTTTTTTTTTTTTTTTGGTGATGGTGTATTGAGT<br>GGGATGCATGCA<br>Fork 30/15-B:<br>TGCATGCATCCCACTCAATACACCATCACCTT<br>TTTTTTTTTTTTTT           |
| Blunt-end dsDNA (30 bp)               |    | DNA 30 mer: GAGCTACCAGCTACCCCGTATGTCAGAGAG<br>DNA 30 mer comp:<br>CTCTCTGACATACGGGGTAGCTGGTAGCTC                                                     |
| ssRNA (30 mer)                        | Used as random sequence ssRNA in EMSA                                               | RNA-30-mer:<br>GAGCUACCAGCUACCCCGUAUGUCAGAGAG                                                                                                        |
| 30-bp blunt-end dsRNA                 |    | RNA-30-mer:<br>GAGCUACCAGCUACCCCGUAUGUCAGAGAG<br>RNA-30mer-comp:<br>CUCUCUGACAUACGGGGUAGCUGGUAGCUC                                                   |
| Forked dsRNA                          |    | Fork RNA-30/15-T:<br>UUUUUUUUUUUUUUUGGUGAUGGUGUAUUGAGU<br>GGAUGCAUGCA<br>Fork RNA 30/15-B:<br>UGCAUGCAUCCCACUCAAUACACCAUCACCUU<br>UUUUUUUUUUUUUU     |
| 13-bp dsRNA with poly (A) 5' tail     |  | RNA-13 B(bottom strand): GCGUCUUUACGGU<br>RNA-41B_15A (top strand):<br>AAAAAAAAAAAAAAAAAACCGUAAAGACGC                                                |
| 13-bp dsRNA with poly (U) 5' tail     |  | RNA-13 B(bottom strand): GCGUCUUUACGGU<br>RNA-41B_15U (top strand):<br>UUUUUUUUUUUUUUACCGUAAAGACGC                                                   |
| 13-bp dsRNA with UUGU repeats 5' tail |  | RNA-13 B(bottom strand): GCGUCUUUACGGU<br>RNA-28B_15UUGU (top strand):<br>UGUUGUUGUUGUUGUACCGUAAAGACGC                                               |
| 20-bp dsDNA with poly (A) 3' tail     |  | Fork 20/15-2 no T (top strand):<br>GGTGATGGTGTATTGAGTGG<br>Fork 20/25-1 A (bottom strand):<br>CCACTCAATACACCATCACCAAAAAAAAAAAAAAAAAAAAA<br>AAAAAAAAA |
| 20-bp dsDNA with poly (T) 3' tail     |  | Fork 20/15-2 no T (top strand):<br>GGTGATGGTGTATTGAGTGG<br>Fork 20/25-1 T (bottom strand):<br>CCACTCAATACACCATCACCTTTTTTTTTTTTTTTTTTTTTT<br>TTTT     |
| 20-bp dsDNA with TTGT repeats 3' tail |  | Fork 20/15-2 no T (top strand):<br>GGTGATGGTGTATTGAGTGG<br>Fork 20/25-1 TTGT (bottom strand):<br>CCACTCAATACACCATCACCTTGTGTGTGTGTGTGTGT<br>TGTTGT    |
| dT <sub>8</sub>                       | Co-purified with DDX43 full-length protein                                          | TTTTTTTT                                                                                                                                             |
| dT <sub>10</sub>                      | Used as ssDNA in NMR                                                                | TTTTTTTTTT                                                                                                                                           |

|                  |                       |                                          |
|------------------|-----------------------|------------------------------------------|
| dT <sub>30</sub> | Used as ssDNA in EMSA | TTTTTTTTTTTTTTTTTTTTTTTTTTTTTTTTTTTTTTTT |
| dA <sub>30</sub> | Used as ssDNA in EMSA | AAAAAAAAAAAAAAAAAAAAAAAAAAAAAAAAAAAA     |
| dC <sub>30</sub> | Used as ssDNA in EMSA | CCCCCCCCCCCCCCCCCCCCCCCCCCCCCCCC         |
| rU <sub>30</sub> | Used as ssRNA in EMSA | UUUUUUUUUUUUUUUUUUUUUUUUUUUUUUUUUU       |
| dT <sub>5</sub>  | Used as ssDNA in NMR  | TTTTT                                    |
| dA <sub>5</sub>  | Used as ssDNA in NMR  | AAAAA                                    |
| dC <sub>5</sub>  | Used as ssDNA in NMR  | CCCCC                                    |
| dG <sub>5</sub>  | Used as ssDNA in NMR  | GGGGG                                    |
| rU <sub>5</sub>  | Used as ssRNA in NMR  | UUUUU                                    |
| MY_CTCTC         | Used as ssDNA in NMR  | CTCTC                                    |
| MY_CACAC         | Used as ssDNA in NMR  | CACAC                                    |
| MY_ATATA         | Used as ssDNA in NMR  | ATATA                                    |
| MY_CGCGC         | Used as ssDNA in NMR  | CGCGC                                    |
| MY_ACCAC         | Used as ssDNA in NMR  | ACCAC                                    |
| MY_ATTAT         | Used as ssDNA in NMR  | ATTAT                                    |
| MY_GTTGT         | Used as ssDNA in NMR  | GTTGT                                    |
| MY_AGAGA         | Used as ssDNA in NMR  | AGAGA                                    |
| MY_TGTGT         | Used as ssDNA in NMR  | TGTGT                                    |
| MY_GGTTG         | Used as ssDNA in NMR  | GGTTG                                    |
| MY_GTTTG         | Used as ssDNA in NMR  | GTTTG                                    |

**Table S3. Primers used in this study**

| <b>Primer</b>                 | <b>Sequence (5'-3')</b>                                                                                 | <b>Used in this study</b>                                                                                                                      |
|-------------------------------|---------------------------------------------------------------------------------------------------------|------------------------------------------------------------------------------------------------------------------------------------------------|
| DDX43-KH-F-NdeI (74 aa)       | ACGTCATATGCCGCTGTGTTTTGCTTTGAAG                                                                         | Forward primer to PCR amplify DDX43 KH domain (74 aa) for cloning in <i>NdeI</i> site of pET28a vector                                         |
| DDX43-KH-R-XhoI (74 aa)       | GCATCTCGAGTTCTGAATTGTAATTTCTTC                                                                          | Reverse primer to PCR amplify DDX43 gene KH domain (74 aa) for cloning in <i>XhoI</i> site of pET28a vector                                    |
| DDX43-KH126aa-Nde1-F          | AGTCCATATGAGAGGTGGTCGCTGGA GAGGC                                                                        | Forward primer to PCR amplify DDX43 KH-126 aa for cloning in <i>NdeI</i> site of pET28a vector                                                 |
| DDX43-KH126aa-Xho1-R          | ACTGCTCGAGTCAATCTATCAATGGC CGATC                                                                        | Reverse primer to PCR amplify DDX43 gene KH 126 for cloning in <i>XhoI</i> site of pET28a vector                                               |
| DDX43-KH89aa-Nde1-F           | ATATCATATGACCTCTAGGCCCCCGG AGGCC                                                                        | Forward primer to PCR amplify DDX43 KH-89 aa for cloning in <i>NdeI</i> site of pET28a vector                                                  |
| DDX43-KH89-Xho1-R             | CATGCTCGAGTCATTCTGAATTGTAA TTTTC                                                                        | Reverse primer to PCR amplify DDX43 gene KH 89 aa for cloning in <i>XhoI</i> site of pET28a vector                                             |
| DDX43-KH80aa-Xho1-R           | ATAGACAATTTTGTTAAATGACTCGA GCATG                                                                        | Reverse primer to PCR amplify DDX43 KH 80 aa fragment for cloning in <i>XhoI</i> site of pET28a vector (using with primer DDX43-KH89aa-Nde1-F) |
| 3xFLAG-F                      | AGCTTATGGACTACAAAGACCATGAC GGTGATTATAAAGATCATGACATCGA TTACAAGGATGACGATGACAAGTGAG                        | 3xFLAG coding sequence. Annealed with 3XFLAG-R and cloned into <i>HindIII</i> and <i>EcoRI</i> site of pcDNA3.0 vector                         |
| 3XFLAG-R                      | AATTCTCACTTGTCATCGTCATCCTTG TAATCGATGTCATGATCTTTATAATCA CCGTCATGGTCTTTGTAGTCCATA                        | 3xFLAG coding sequence. Annealed with 3XFLAG-F and cloned into <i>HindIII</i> and <i>EcoRI</i> site of pcDNA3.0 vector                         |
| pcDNA3-DDX43-KH89-Hind3-F     | ACTGAAGCTTGCCGCCACCATGACCT CTAGGCCCCCGGAG                                                               | Forward primer to PCR amplify DDX43 KH-89 aa fragment for cloning in <i>HindIII</i> site of pcDNA3.0 vector                                    |
| pcDNA3-FLAG-DDX43-KH89-Xho1-R | ACTACTCGAGTCACTTGTCATCGTCA TCCTTGTAATCGATGTCATGATCTTTA TAATCACCGTCATGGTCTTTGTAGTCT TCTGAATTGTAATTTTCTTC | Reverse primer with to PCR amplify DDX43 KH 89 fragment for cloning in <i>XhoI</i> site of pcDNA3.0 vector with a 3xFLAG tag                   |
| DDX43-A81I-F-new              | GAAGAGCCACTTTGTTGGCATCGTAA TCGGTTCGTGGTGGGTC                                                            | Forward primer for site-directed mutagenesis of DDX43-KH-A81I                                                                                  |
| DDX43-A81I-R-new              | GACCCACCACGACCGATTACGATGCC AACAAAGTGGCTCTTC                                                             | Reverse primer for site-directed mutagenesis of DDX43- KH-A81I                                                                                 |
| DDX43-A81G-F                  | GAAGAGCCACTTTGTTGGCGGGGTAA TCGGTTCGTGGTGGGTC                                                            | Forward primer for site-directed mutagenesis of DDX43-KH-A81G                                                                                  |
| DDX43-A81G-R                  | GACCCACCACGACCGATTACCCCGCC AACAAAGTGGCTCTTC                                                             | Reverse primer for site-directed mutagenesis of DDX43- KH-A81G                                                                                 |
| DDX43-A81S-F                  | GAAGAGCCACTTTGTTGGCTCGGTAA TCGGTTCGTGGTGGGTC                                                            | Forward primer for site-directed mutagenesis of DDX43-KH-A81S                                                                                  |
| DDX43-A81S-R                  | GACCCACCACGACCGATTACCGAGCC AACAAAGTGGCTCTTC                                                             | Reverse primer for site-directed mutagenesis of DDX43- KH-A8SI                                                                                 |
| DDX43-G87D-F                  | GTAATCGGTCGTGGTACTCAAAAAT AAAGAAT                                                                       | Forward primer for site-directed mutagenesis of DDX43-G154D                                                                                    |
| DDX43-G87D-R                  | ATTCTTTATTTTTGAGTCACCACGACC GATTAC                                                                      | Reverse primer for site-directed mutagenesis of DDX43-G154D                                                                                    |
| MY-Forward selection primer   | TAGGGAAGAGAAGGACATATGAT                                                                                 | Forward primer to PCR amplify SELEX library insert (20 nt random sequence)                                                                     |
| MY-Reverse selection primer   | TCAAGTGGTCATGTAAGTCAAA                                                                                  | Reverse primer to PCR amplify SELEX library insert (20 nt random sequence)                                                                     |

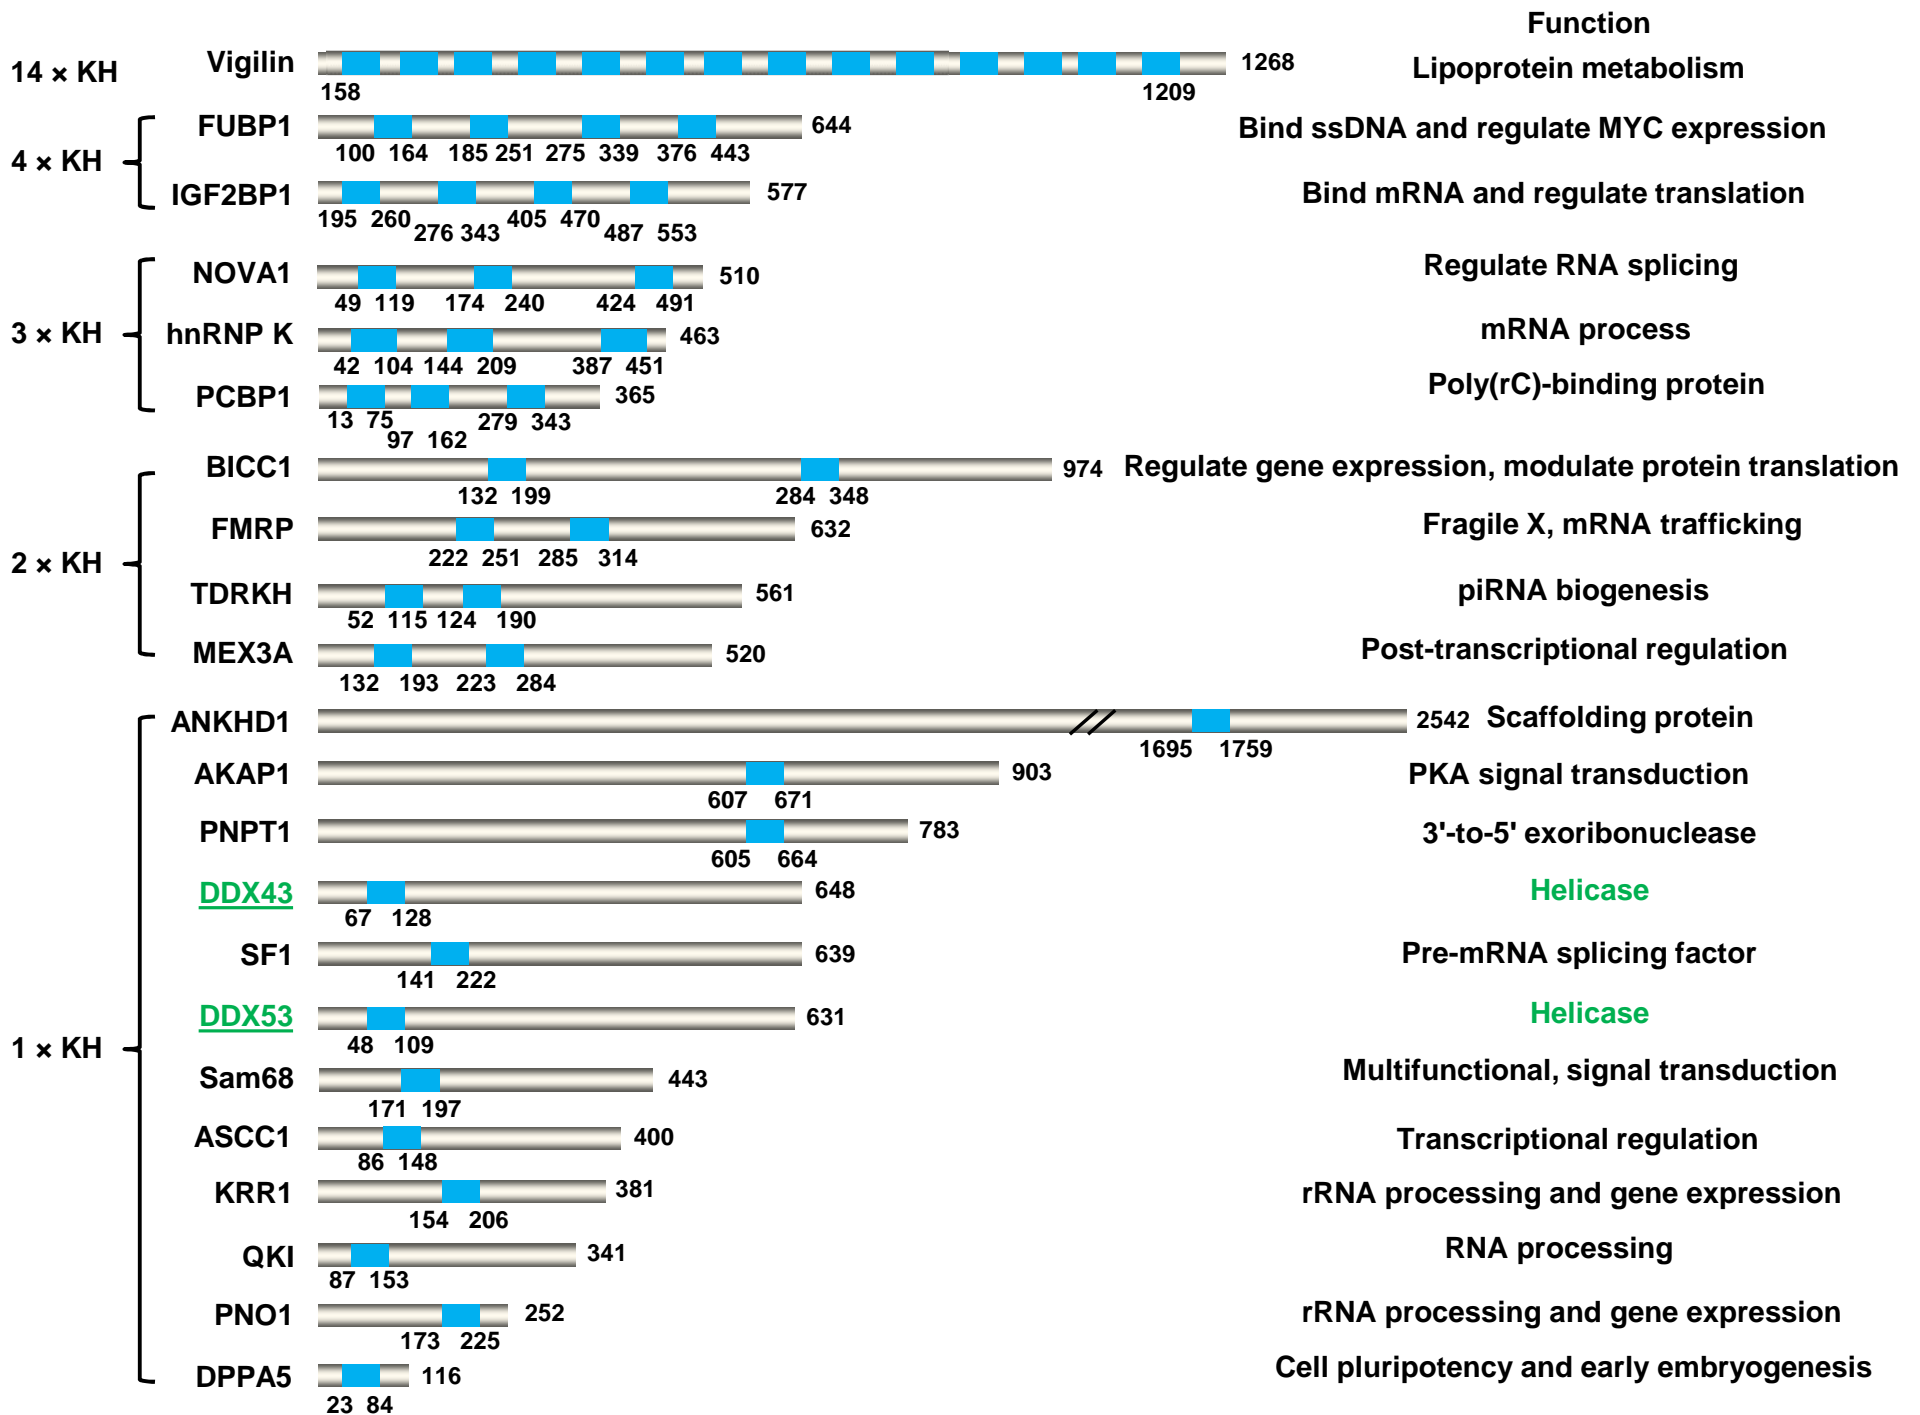

**Figure S1. Summary of KH domain containing human proteins.** A total of 40 human proteins contain KH domain(s). The KH domain region and protein function are adapted from Uniprot ([www.uniprot.org/](http://www.uniprot.org/)) and GeneCards ([www.genecards.org](http://www.genecards.org)) respectively. All proteins can bind RNA, which is not shown in the function. The DDX43 and DDX53 are highlighted in green. For the paralogs such as FUBP1 and FUBP3; FXR1, FXR2, and FMRP; MEX3A, MEX3B, MEX3C, and MEX3D; KHDRBS1, KHDRBS2, and KHDRBS3; PCBP1, PCBP2, PCBP3, and PCBP4; IGF2BP1, IGF2BP2, and IGF2BP3; NOVA1 and NOVA2, only one of them is shown.

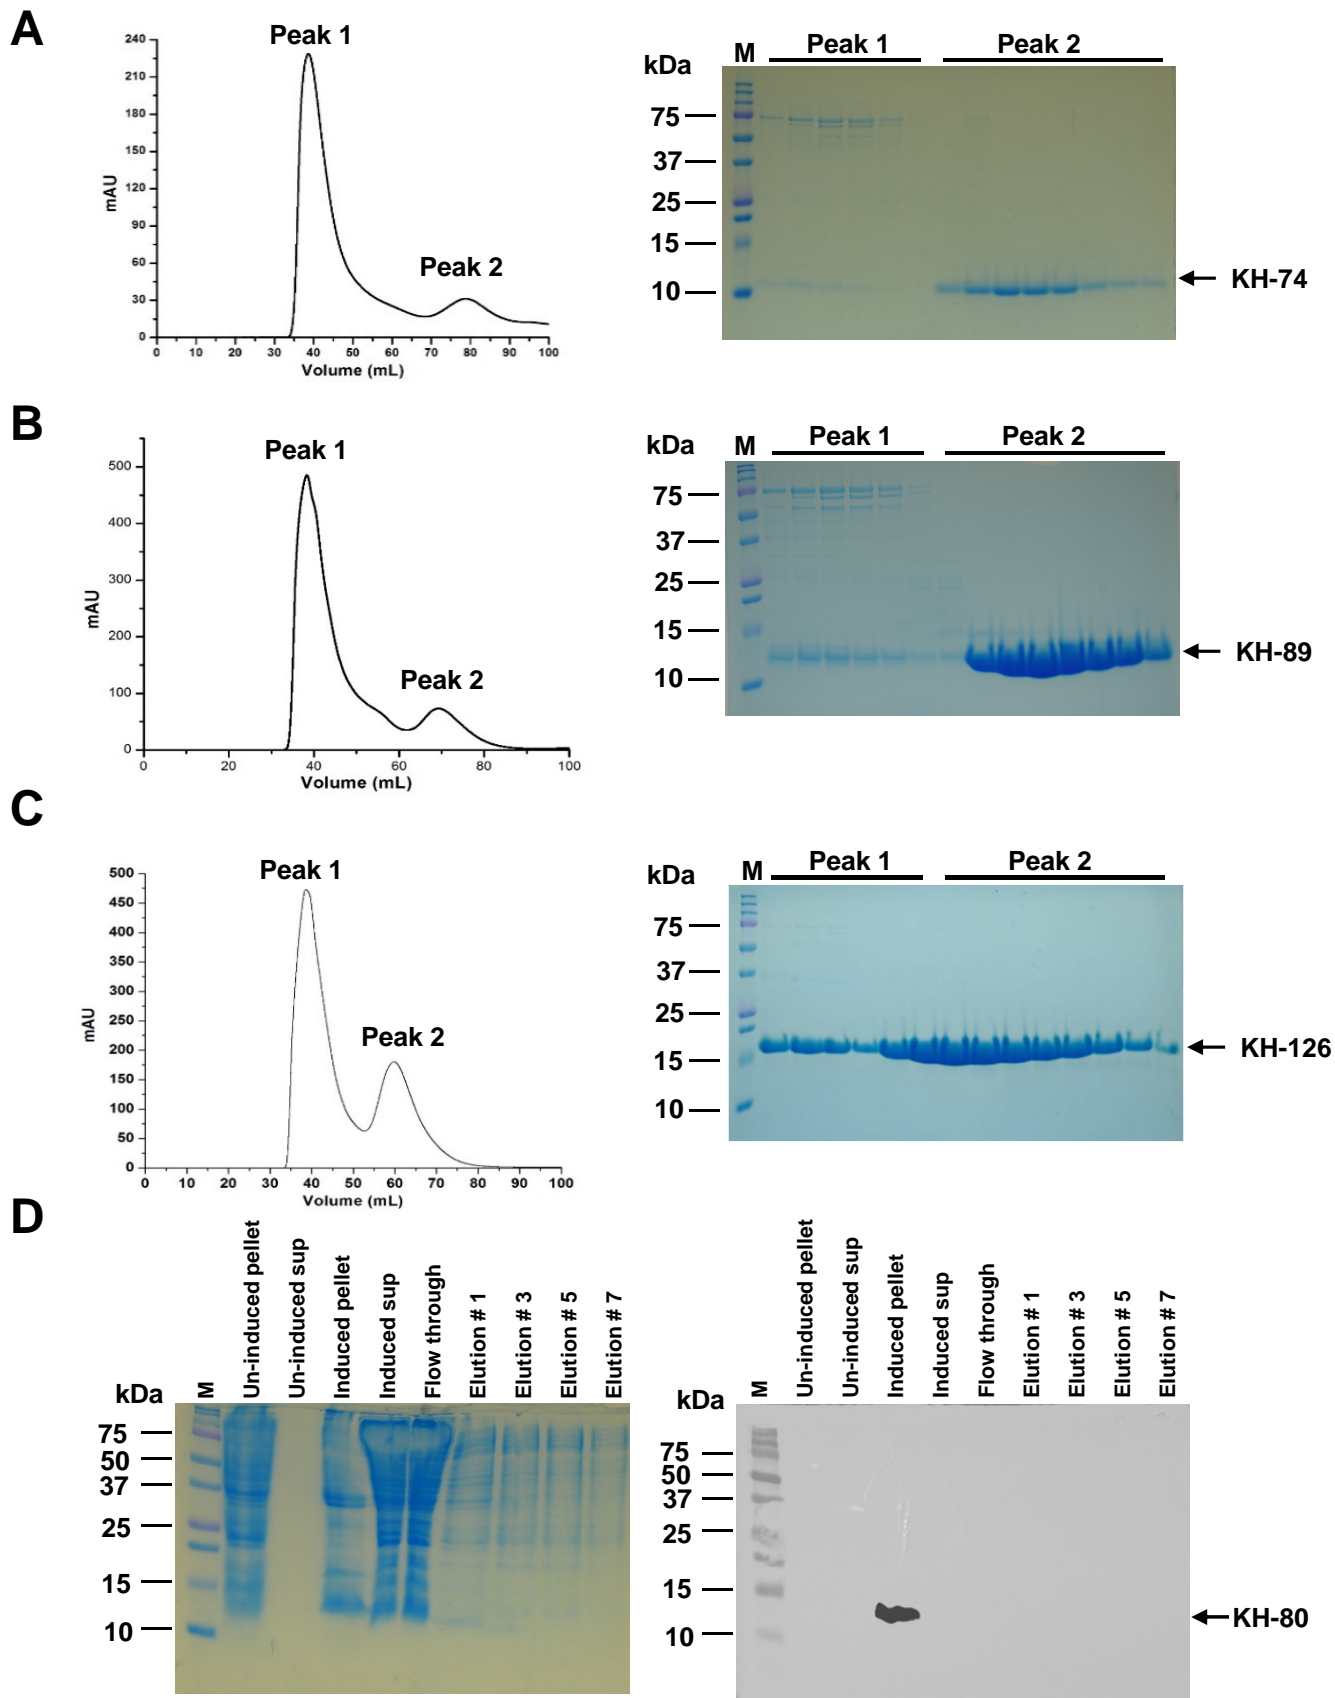

**Figure S2. Purification of KH domain proteins.** (A-C) Chromatographic profiles of recombinant KH domain proteins eluting from a Sephacryl S-100 column (left) and SDS-PAGE analysis of the eluted fractions (right). M, marker. (D) SDS-PAGE analysis of the expression and purification of DDX43-KH-80 protein (left) and Western blotting using an anti-His antibody (right).



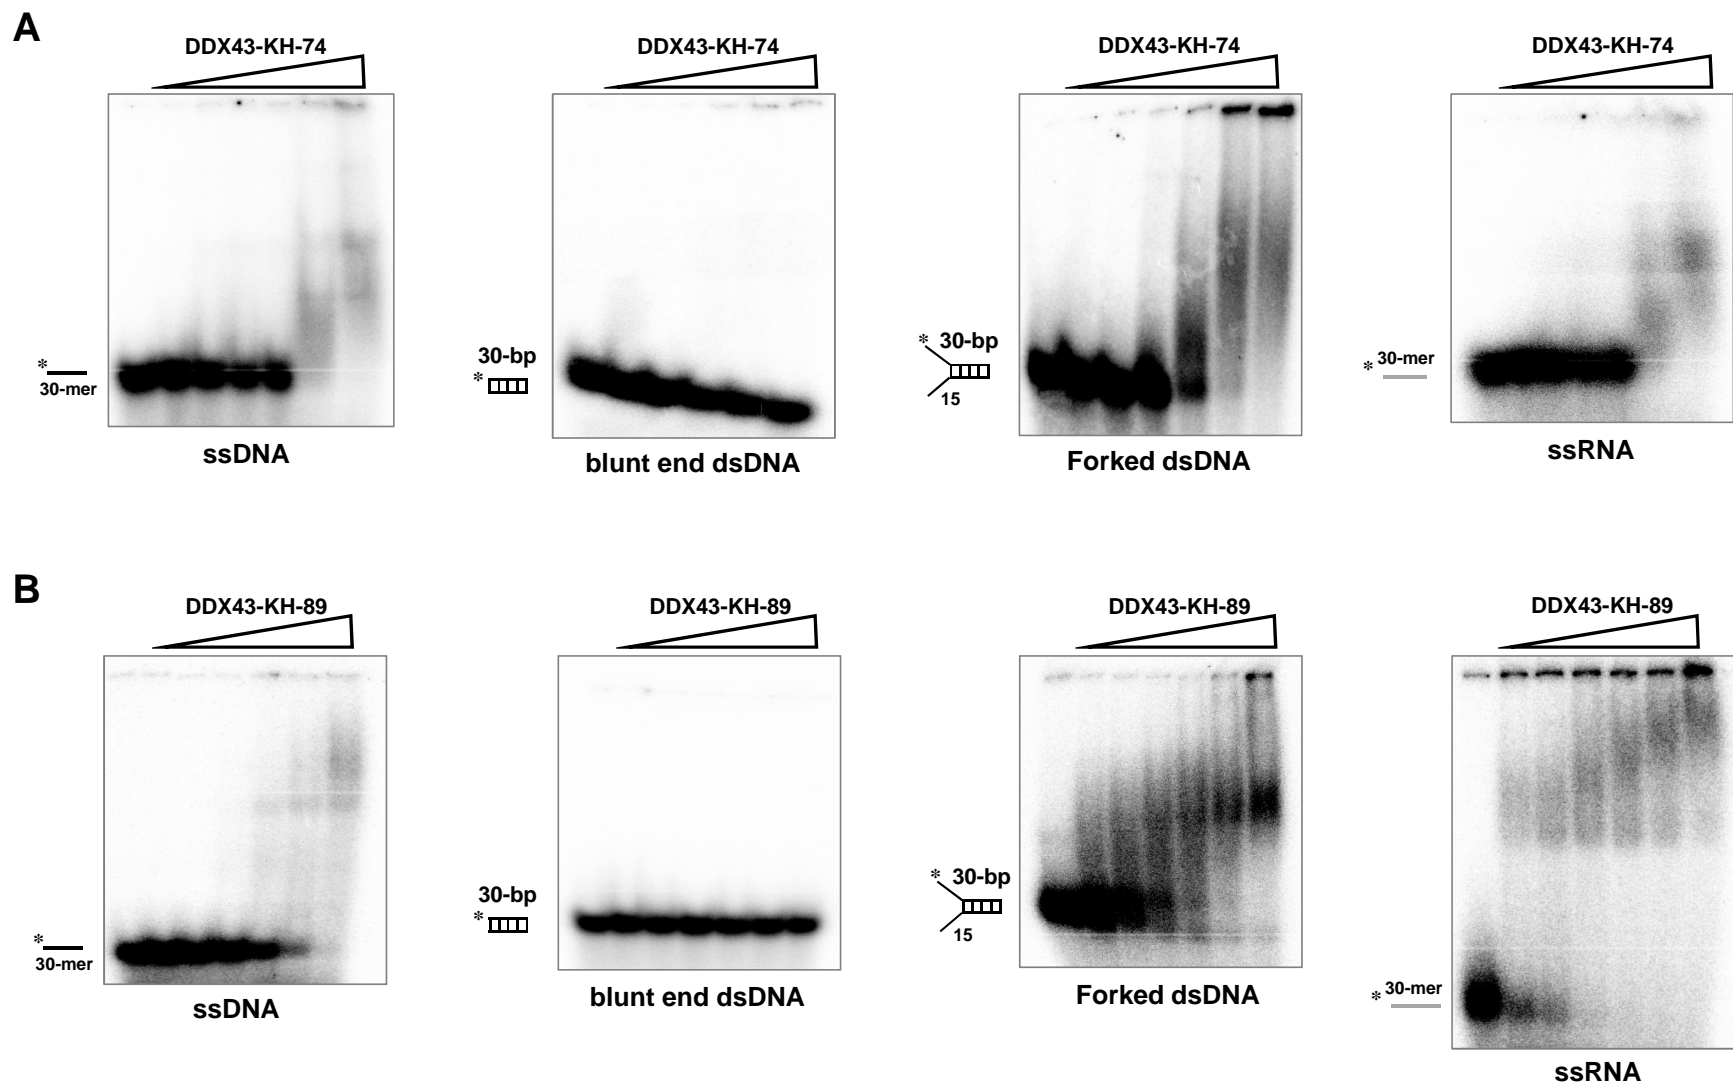

**Figure S3. EMSA of DDX43 KH-74 and -89 proteins binding with different substrates.** Representative EMSA images of increasing protein concentration (0–9.6  $\mu$ M) of DDX43 KH domain proteins, 74aa (A) and 89aa (B), binding with 0.5 nM of indicated substrates. DNA is in black, RNA in gray.

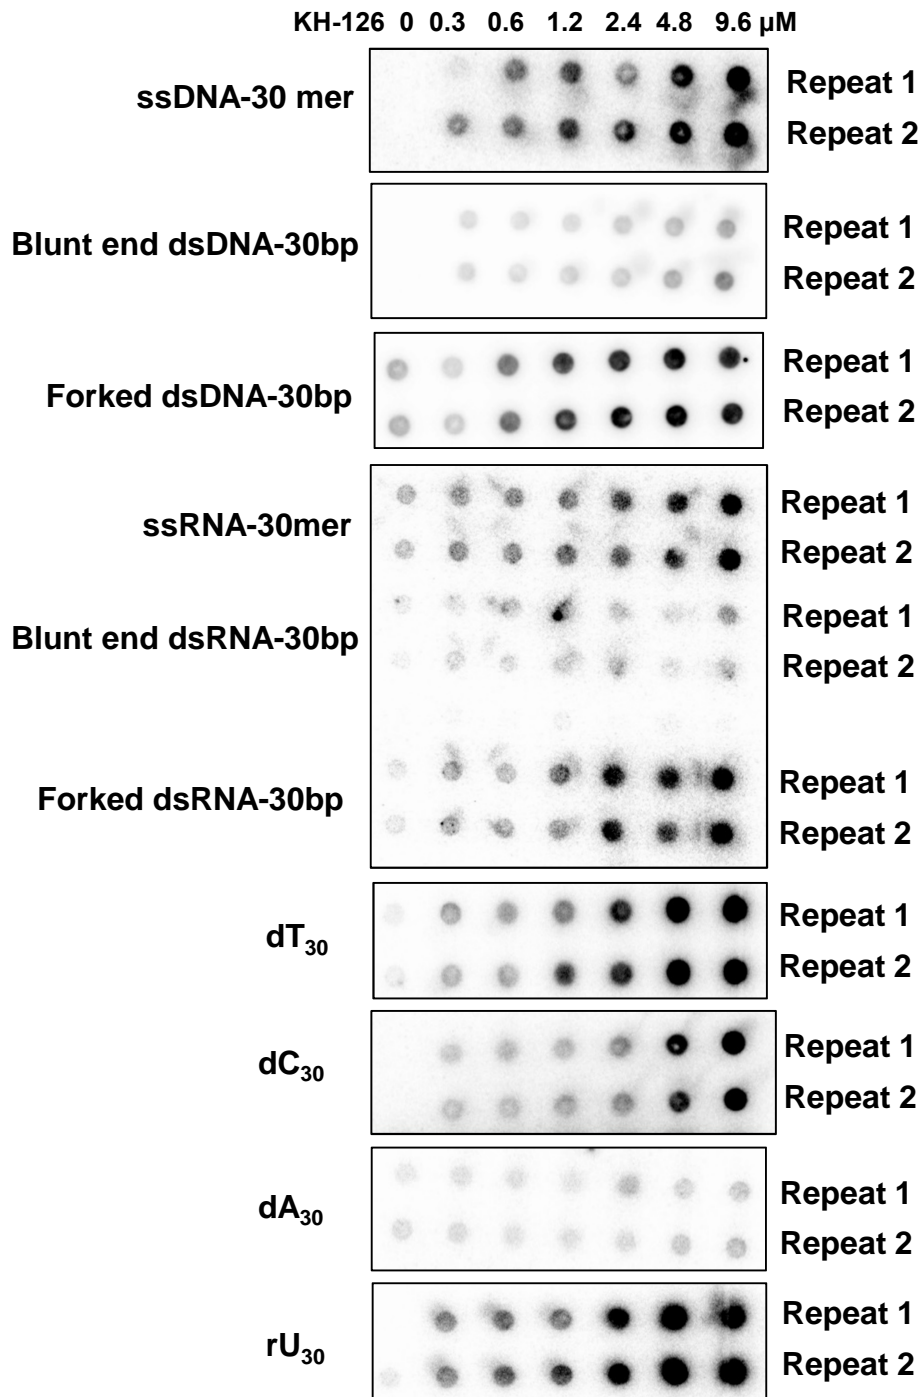

**Figure S4. Representative images of filter binding assays.** <sup>32</sup>P-labeled oligo or substrate (0.5 nM) was incubated with DDX43-KH 126 protein (0, 0.3, 0.6, 1.2, 2.4, 4.8, 9.6  $\mu$ M) at 37°C for 30 min, then passed through a nitrocellulose membrane. After washing, bound radioactivity was visualized using a PharosFX Imager. Each sample has two repeats.

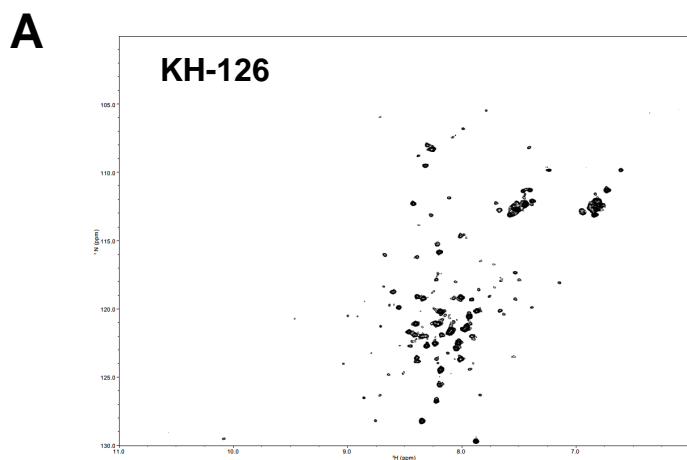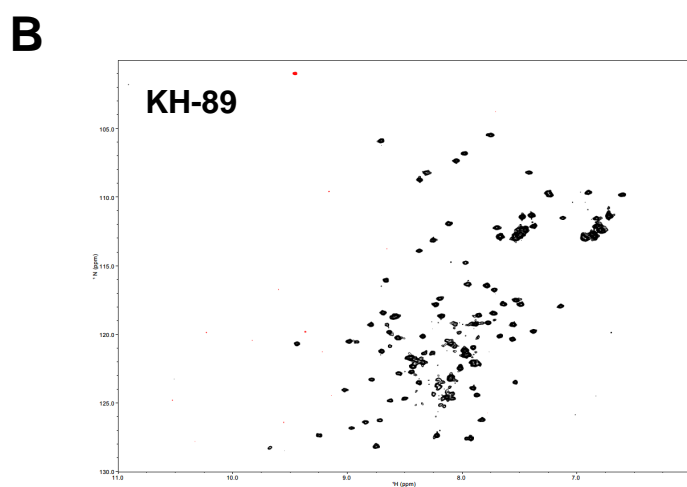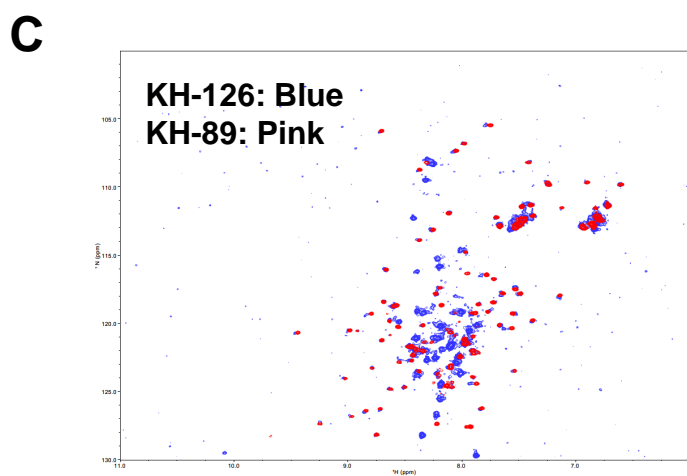

**Figure S5.  $^1\text{H}$ - $^{15}\text{N}$  HSQC spectra of apo KH-126 and -89 proteins that have His tag. (A and B)  $^1\text{H}$ - $^{15}\text{N}$  HSQC spectra of KH-126 protein (A) and KH-89 protein (B). (C) Overlay of  $^1\text{H}$ - $^{15}\text{N}$  HSQC spectra of the KH-126 (blue) and KH-89 (pink) proteins.**

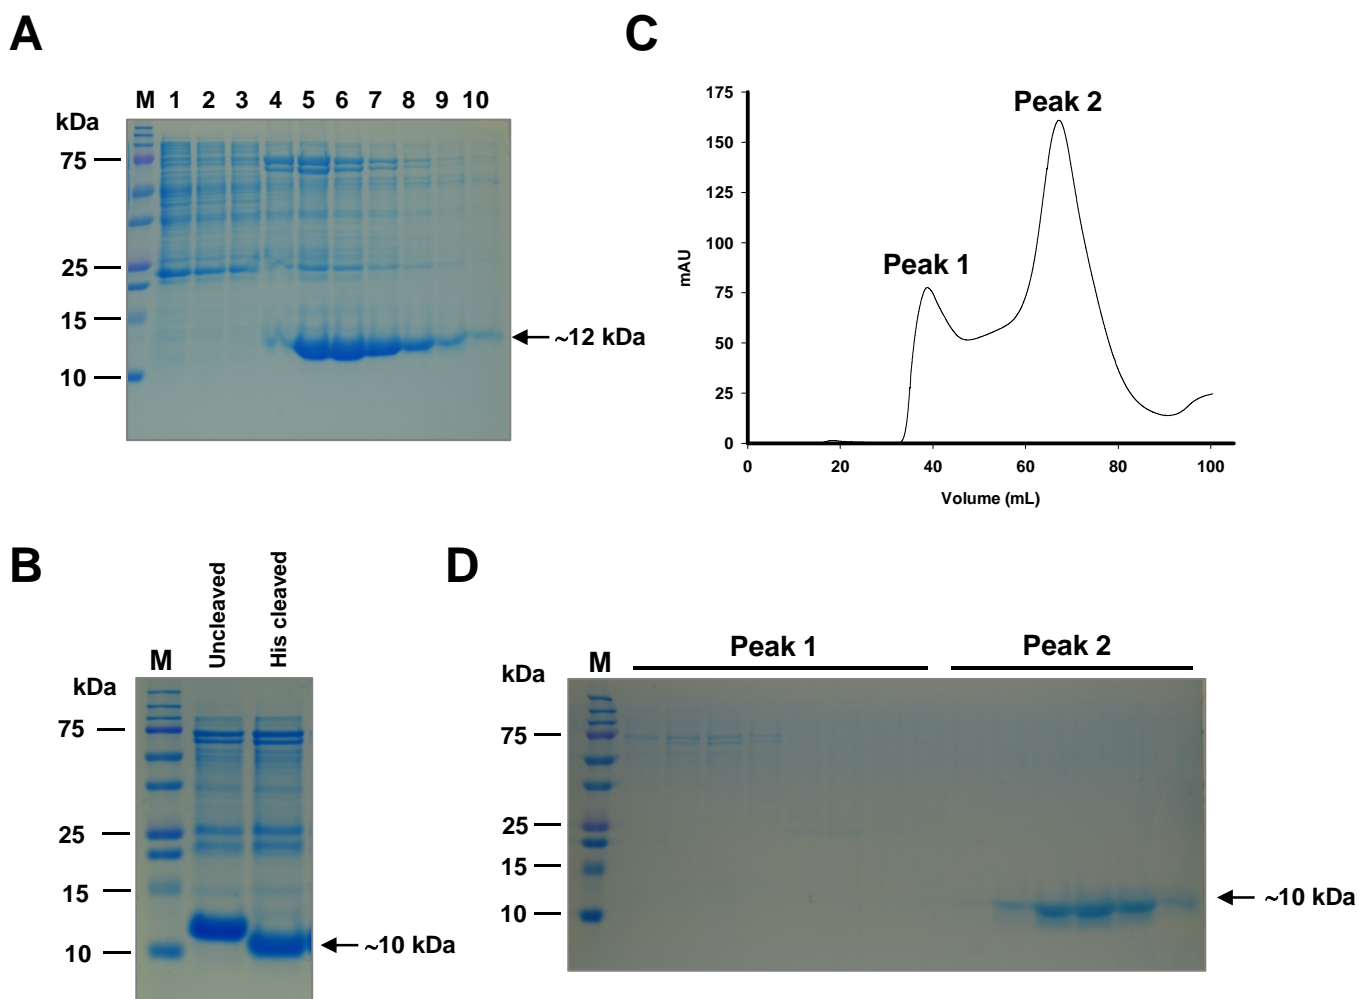

**Figure S6. Purification of His tag cleaved DDX43 KH-89 protein for NMR analysis.** (A) SDS-PAGE analysis of the eluted KH-89 fractions from a Ni-NTA affinity column by imidazole. M, marker; 1-10, fractions. (B) SDS-PAGE analysis of thrombin-cleaved and uncleaved KH-89 proteins. (C) Chromatographic profile of thrombin-cleaved KH-89 protein eluting from a Sephacryl S-100 column. (D) SDS-PAGE analysis of the KH-89 protein peaks eluted from the gel filtration chromatography in panel C.

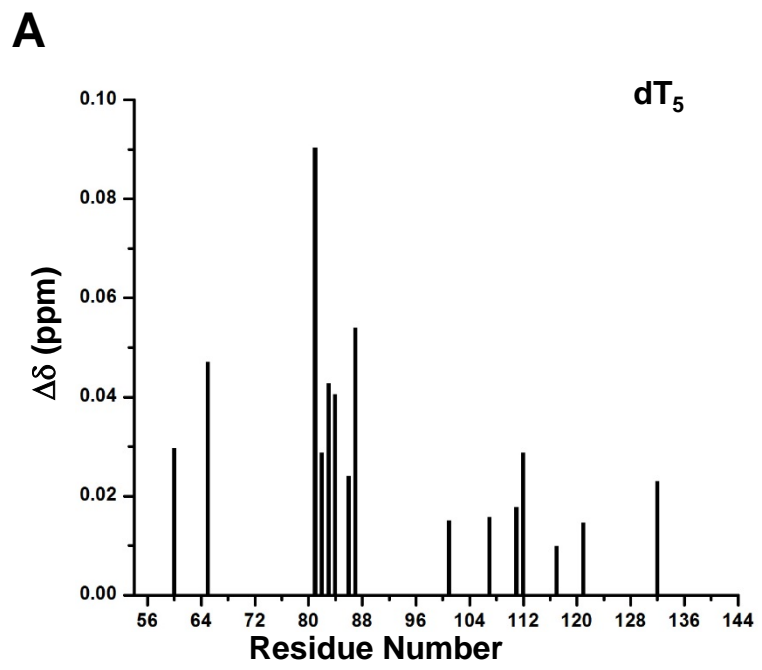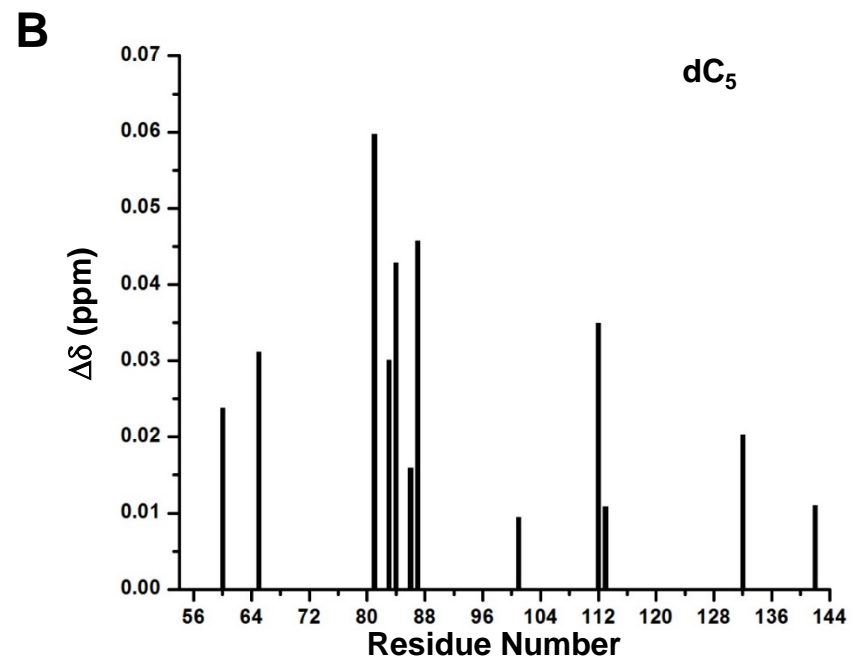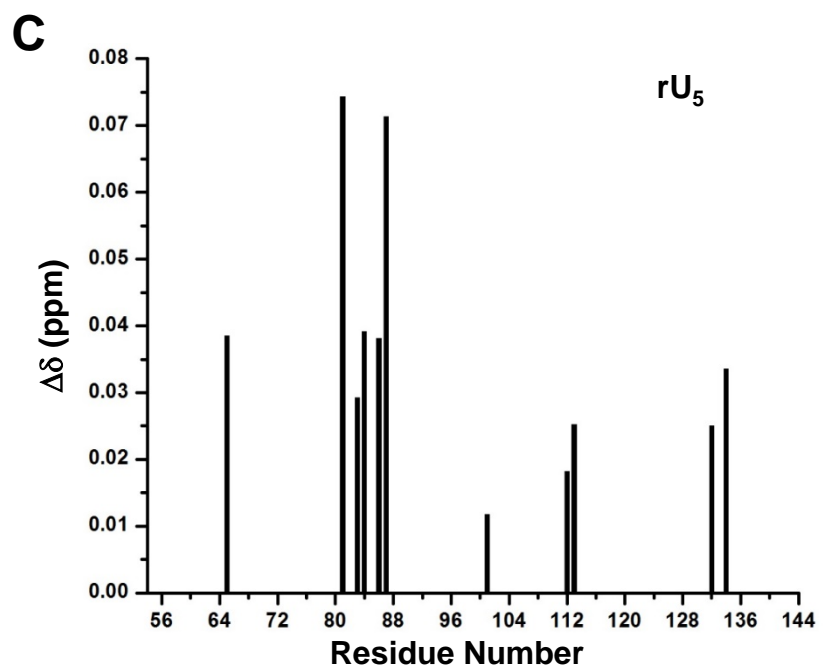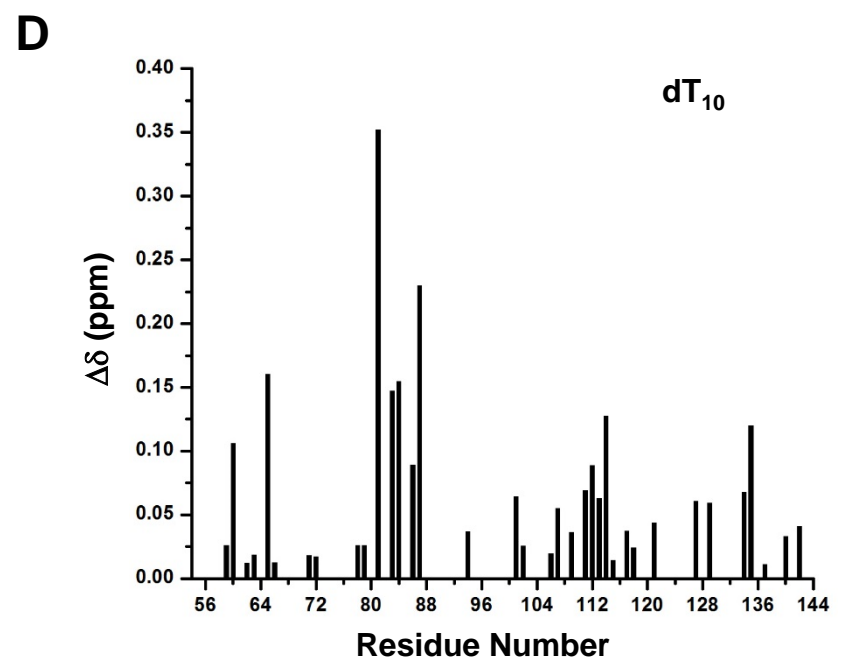

**Figure S7**

**E**

|                                   | <b>GXXG</b>         |
|-----------------------------------|---------------------|
| <i>Homo sapiens</i>               | VGAVIGRGGSKIK       |
| <i>Macaca mulatta</i>             | VGAVIGRGGSKIK       |
| <i>Pan troglodytes</i>            | VGAVIGRGGSKIK       |
| <i>Rattus norvegicus</i>          | VGAVIGRGGSKIR       |
| <i>Mus musculus</i>               | VGAVIGRGGSKIR       |
| <i>Felis catus</i>                | VGAVIGRGGSKIK       |
| <i>Bos Taurus</i>                 | VGAVIGRGGSNIK       |
| <i>Ovis aries</i>                 | VGAVIGRGGSNIK       |
| <i>Anolis caroli nensis</i>       | VGALIGRGGSRIK       |
| <i>Ptilocolobus tephrosceles</i>  | VGAVIGRGGSKIK       |
| <i>Microtus ochrogaster</i>       | VGAVIGRGGSKIR       |
| <i>Urocitellus parryii</i>        | VGAVIGRGGSKIK       |
| <i>Bos indicus x Bos Taurus</i>   | VGAVIGRGGSNIK       |
| <i>Lagenorhynchus obliquidens</i> | VGAVIGRGGSKIK       |
| <i>Acinonyx jubatus</i>           | VGAVIGRGGSKIK       |
| <i>Zalophus californianus</i>     | VGAVIGRGGSKIK       |
| <i>Ursus arctos horribilis</i>    | VGAVIGRGGSKIK       |
|                                   | <b>A81      G87</b> |

**F**

|              | <b>A81</b>         | <b>G87</b> |
|--------------|--------------------|------------|
| hnRNP K (1)  | AGAVIGKGGKNIKAL    |            |
| hnRNP K (2)  | AGGIIGVKGAKIKEL    |            |
| hnRNP K (3)  | AGSIIKGGQRIKQI     |            |
| FMR-1 (1)    | MGLAIGTHGANIQQA    |            |
| FMR-1 (2)    | VGKVIKNGKLIQEI     |            |
| NOVA (1)     | AGSIIKGGQTIVQL     |            |
| NOVA (2)     | AGLIIKGGATVKAV     |            |
| NOVA (3)     | VGAILKGGKTLVEY     |            |
| SF1          | VGLLIGPRGNTLKNI    |            |
| <b>DDX43</b> | VGAVIGRGGSKIKNI    |            |
| KHDR1        | VGKILGPQGNTIKRL    |            |
| DDX53        | VGVVI GYSGSKIKDL   |            |
| TDRKH        | VGRII GRGGETIRSI   |            |
| KSRP         | VG VVI GRSGEMIKKI  |            |
| PCBP2        | CGSLI KGGCKIKEI    |            |
| AKAP149      | VGR LI GKQGRYVSFL  |            |
| ANKHD1       | VSRIM GRGGCNITAI   |            |
| RS3          | TQ NVL GEKGRRIREL  |            |
| FUBP1        | VGL I I GRGGEQINKI |            |
| IF2B3        | AGR VI KGGKTVNEL   |            |
| M3XC         | VGL VV GPKGATIKRI  |            |
| VIGILIN      | HK FLI KGGGKIRKV   |            |
| ANKRD17      | ISR VI GRGGCNINAI  |            |
|              | <b>GXXG</b>        |            |

**Figure S7. Nucleic acid bind to the same amino acids in the KH domain, especially A81 and G87.** (A-D) Combined chemical shift change ( $\Delta\delta$ ) as a function of KH-89 (200  $\mu$ M) residue number observed for dT<sub>5</sub> (A), dC<sub>5</sub> (B), rU<sub>5</sub> (C) and dT<sub>10</sub> (D) oligonucleotide (400  $\mu$ M) binding. (E) Amino acids A81 and G87 are conserved in DDX43 proteins from different eukaryotes. (F) Alignment of the GXXG motifs from DDX43 and other known human KH domains, showing G87 is conserved, but not A81.

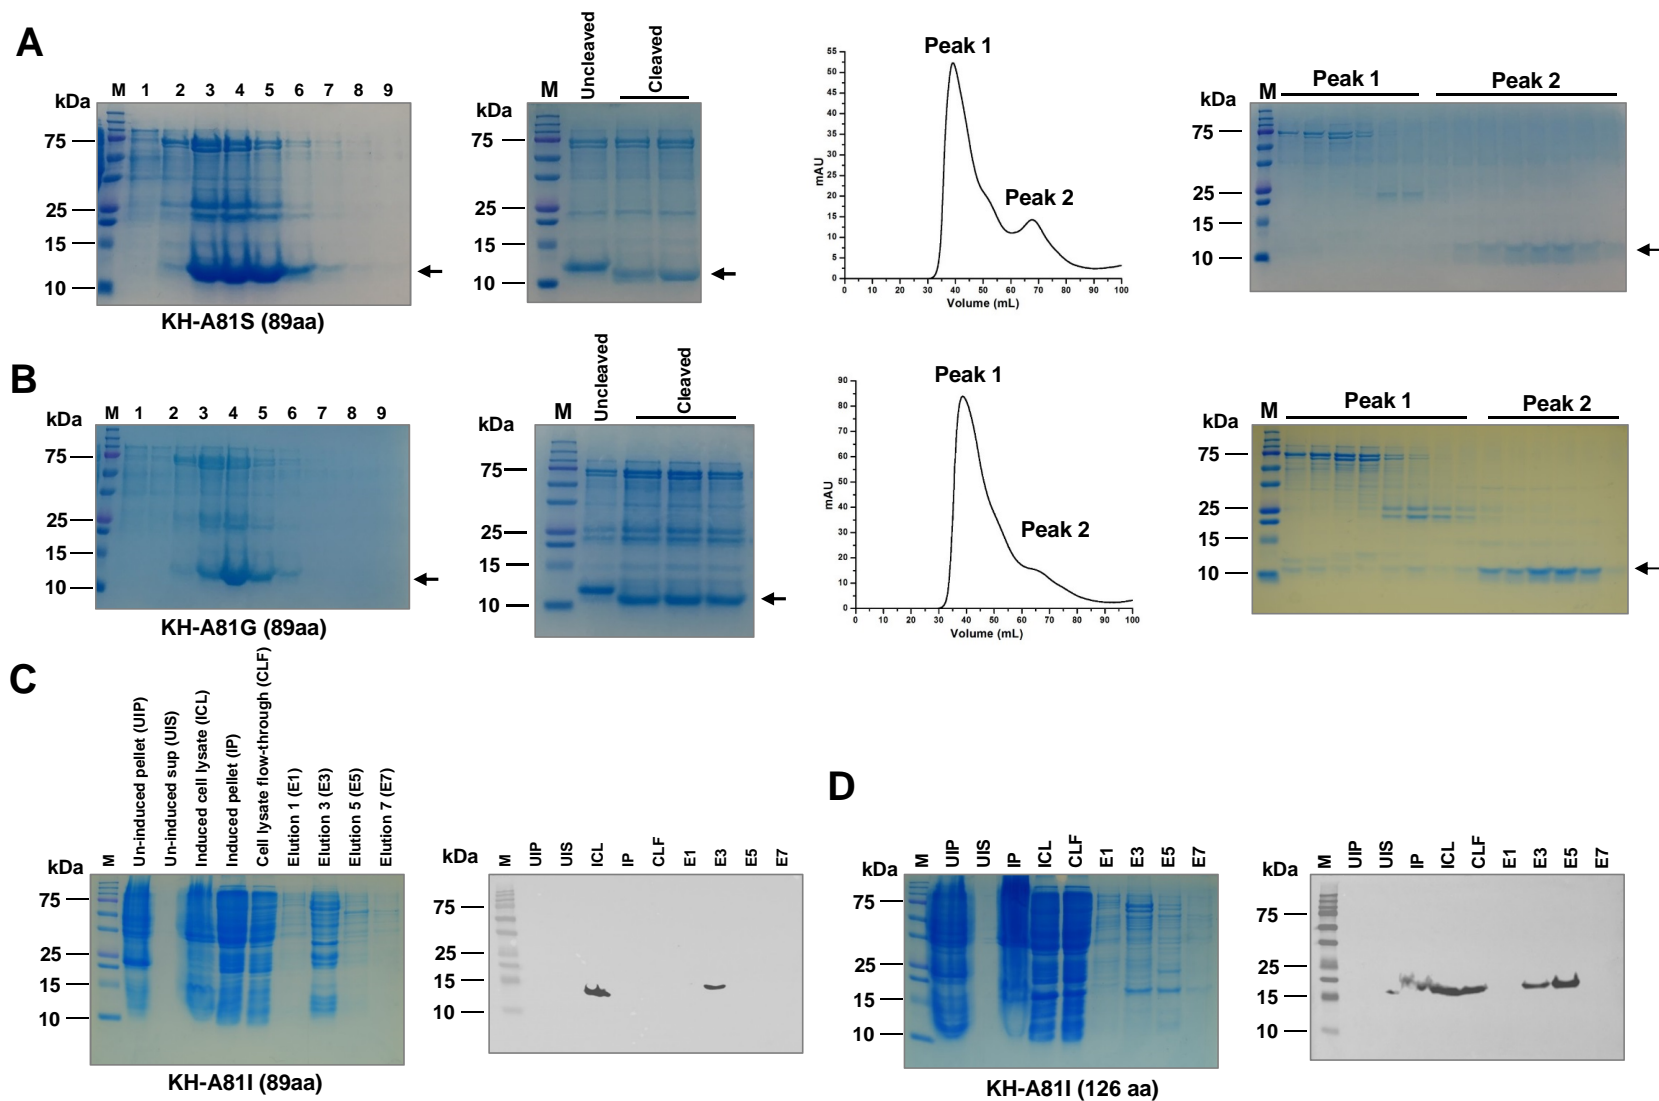

**Figure S8. Purification of DDX43 KH-A81S, -A81G, and -A81I proteins.** (A and B) SDS-PAGE analysis of the expression and purification of KH-A81S (A) and -A81G (B), and gel filtration profiles. His tag was cleaved by thrombin. M, marker. (C and D) SDS-PAGE analysis of the expression and purification of the KH-A81I protein (left) and Western blotting using an anti-His antibody (right) in KH-89aa (C) and KH-126aa (D) constructs.

**A**

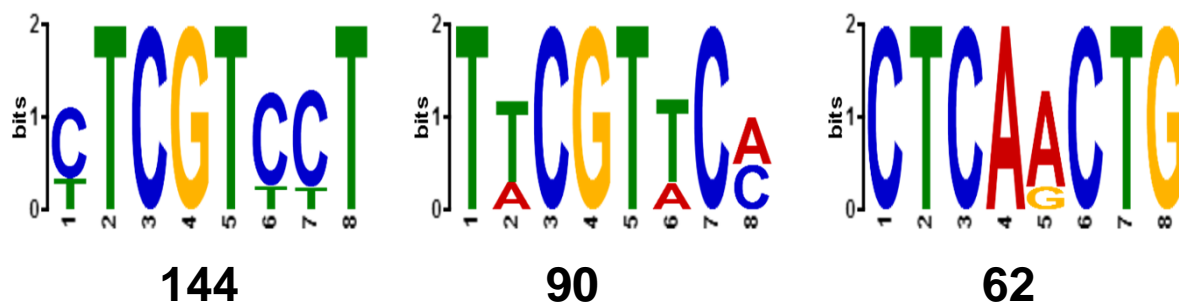

**B**

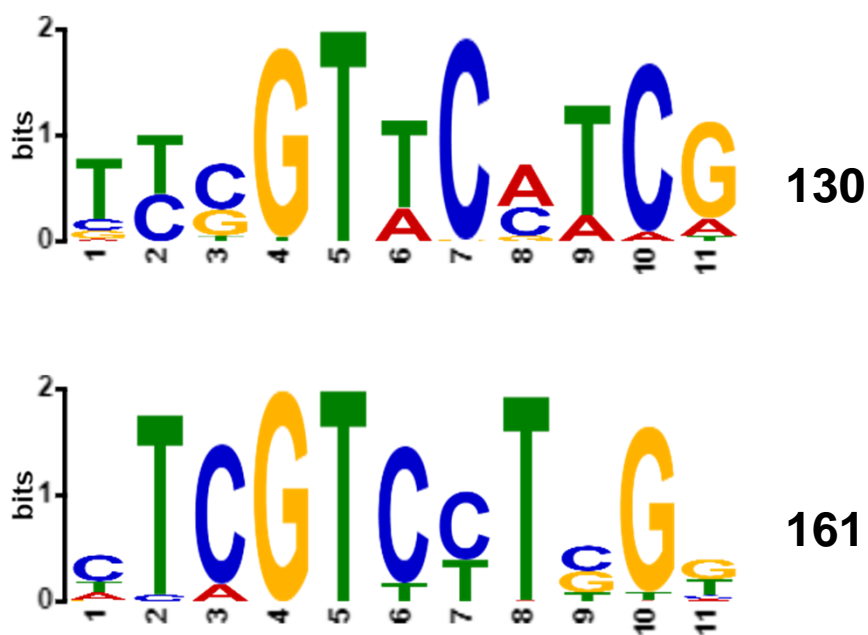

**Figure S9. Top DNA sequence motifs identified by SELEX and analyzed by the MEME server with 6-8 nt (A) and 5-20 nt width (B). Number of sequences containing the respective motif are indicated.**



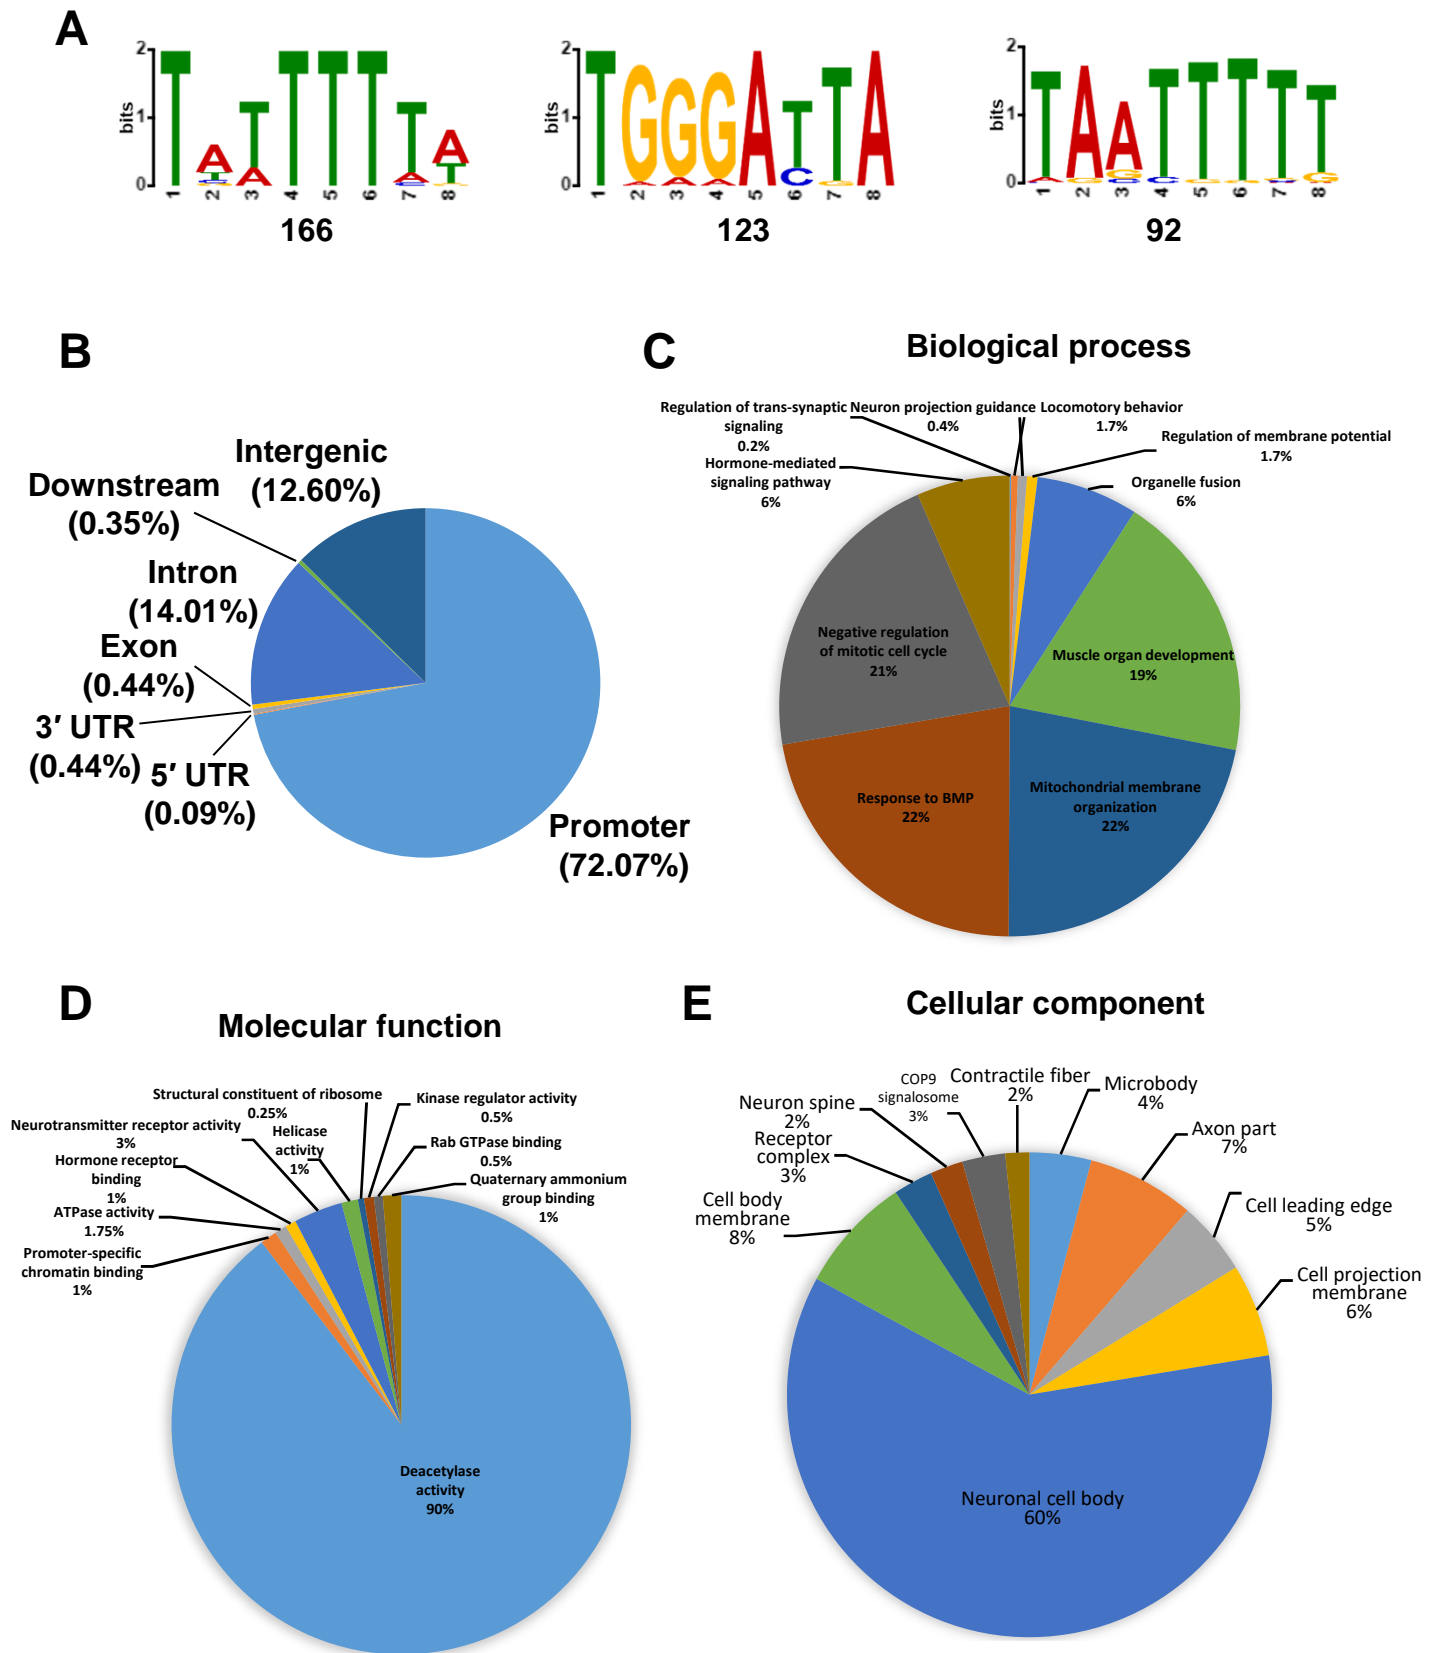

**Figure S10. Identification of DDX43 KH domain bound DNA by ChIP-seq method.** (A) Top three motif sequences obtained by the ChIP-Seq method. (B) Distribution of DDX43 KH domain peaks across the human genome. (C-E) Distribution of gene ontology terms among the annotated sequences for biological process (C), molecular function (D), and cellular component (E).

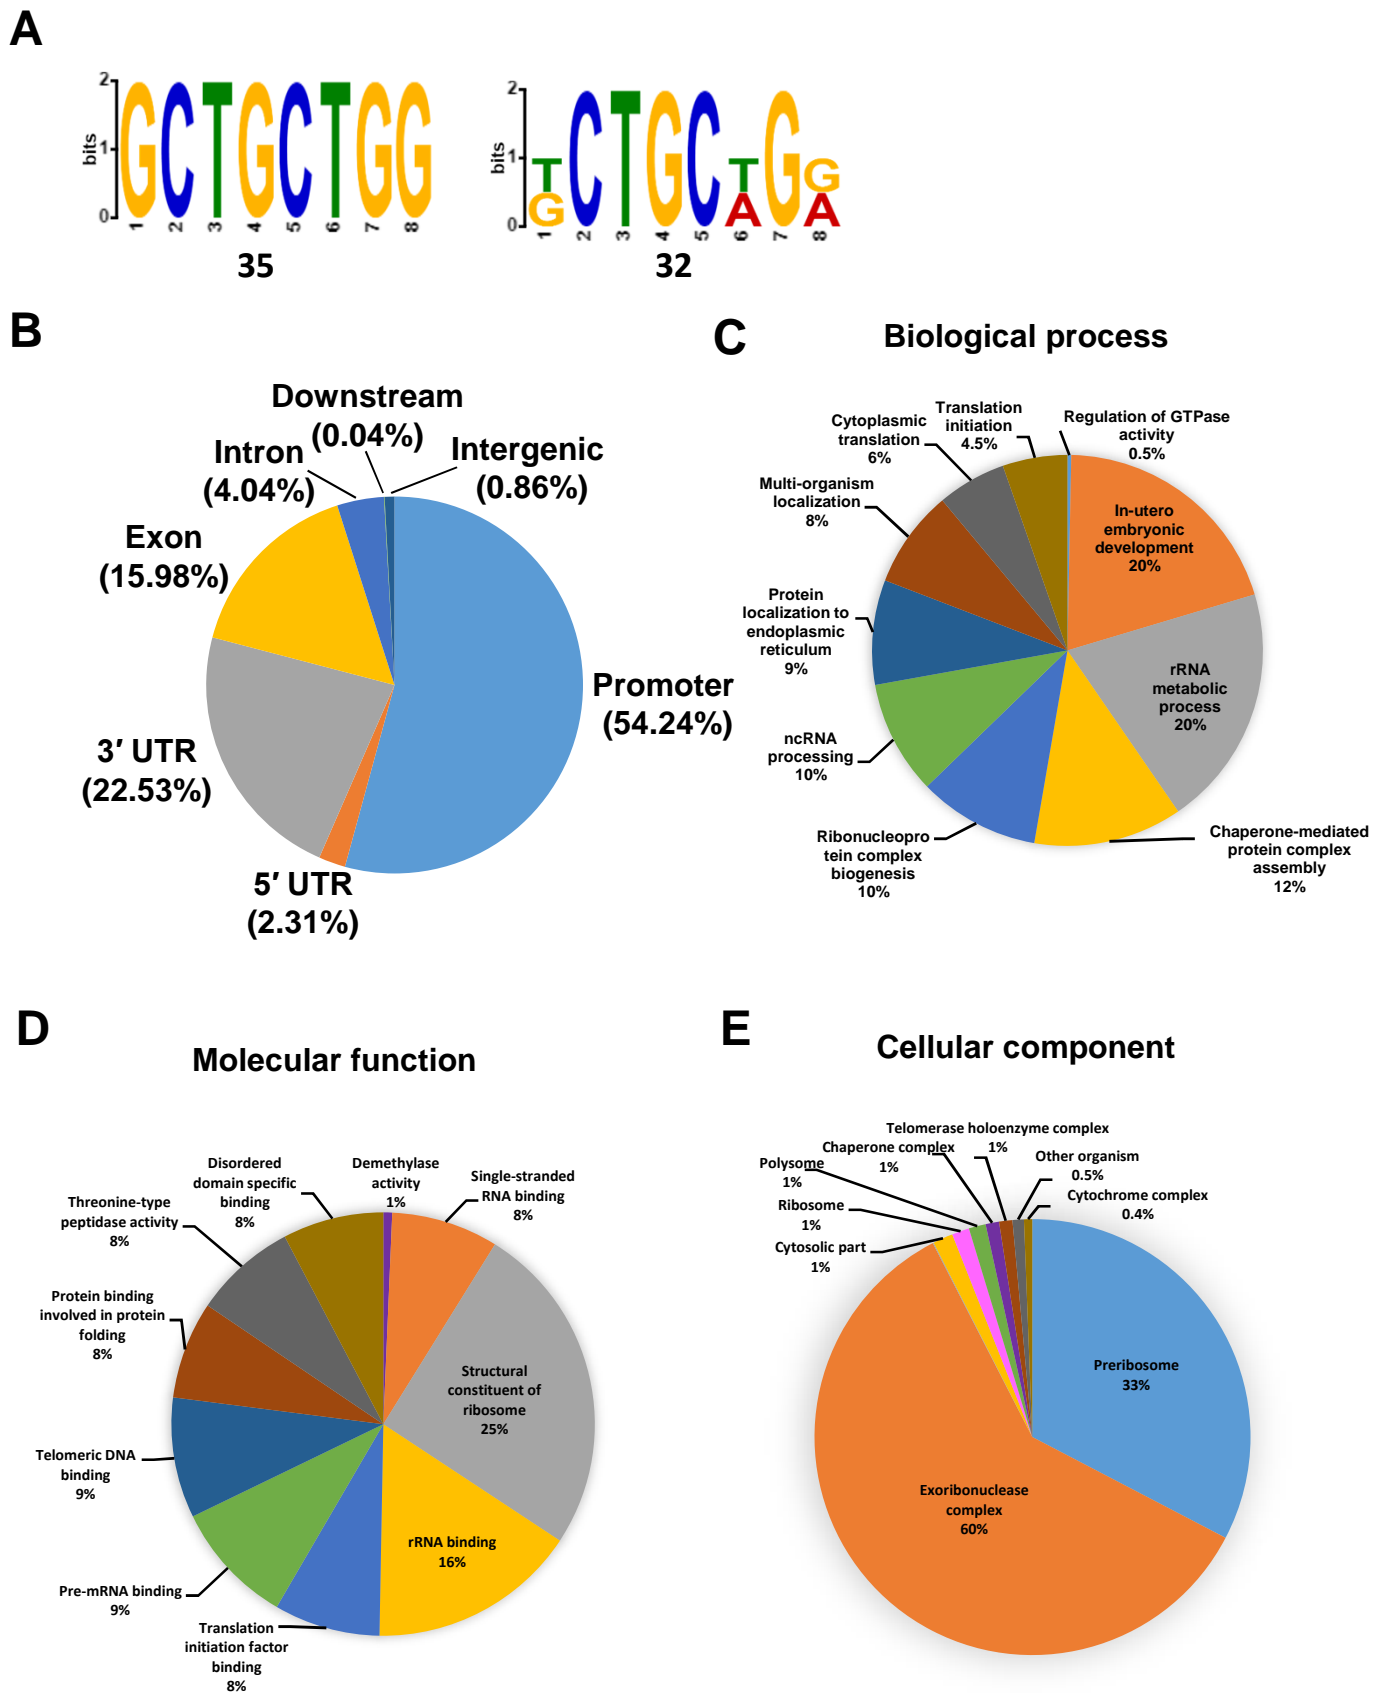

**Figure S11. Identification of DDX43 KH domain bound RNA by CLIP-seq method.** (A) Top two motif sequences obtained by the CLIP-Seq method. (B) Distribution of DDX43 KH domain peaks across the human genome. (C-E) Distribution of gene ontology terms among the annotated sequences for biological process (C), molecular function (D), and cellular component (E).

**A**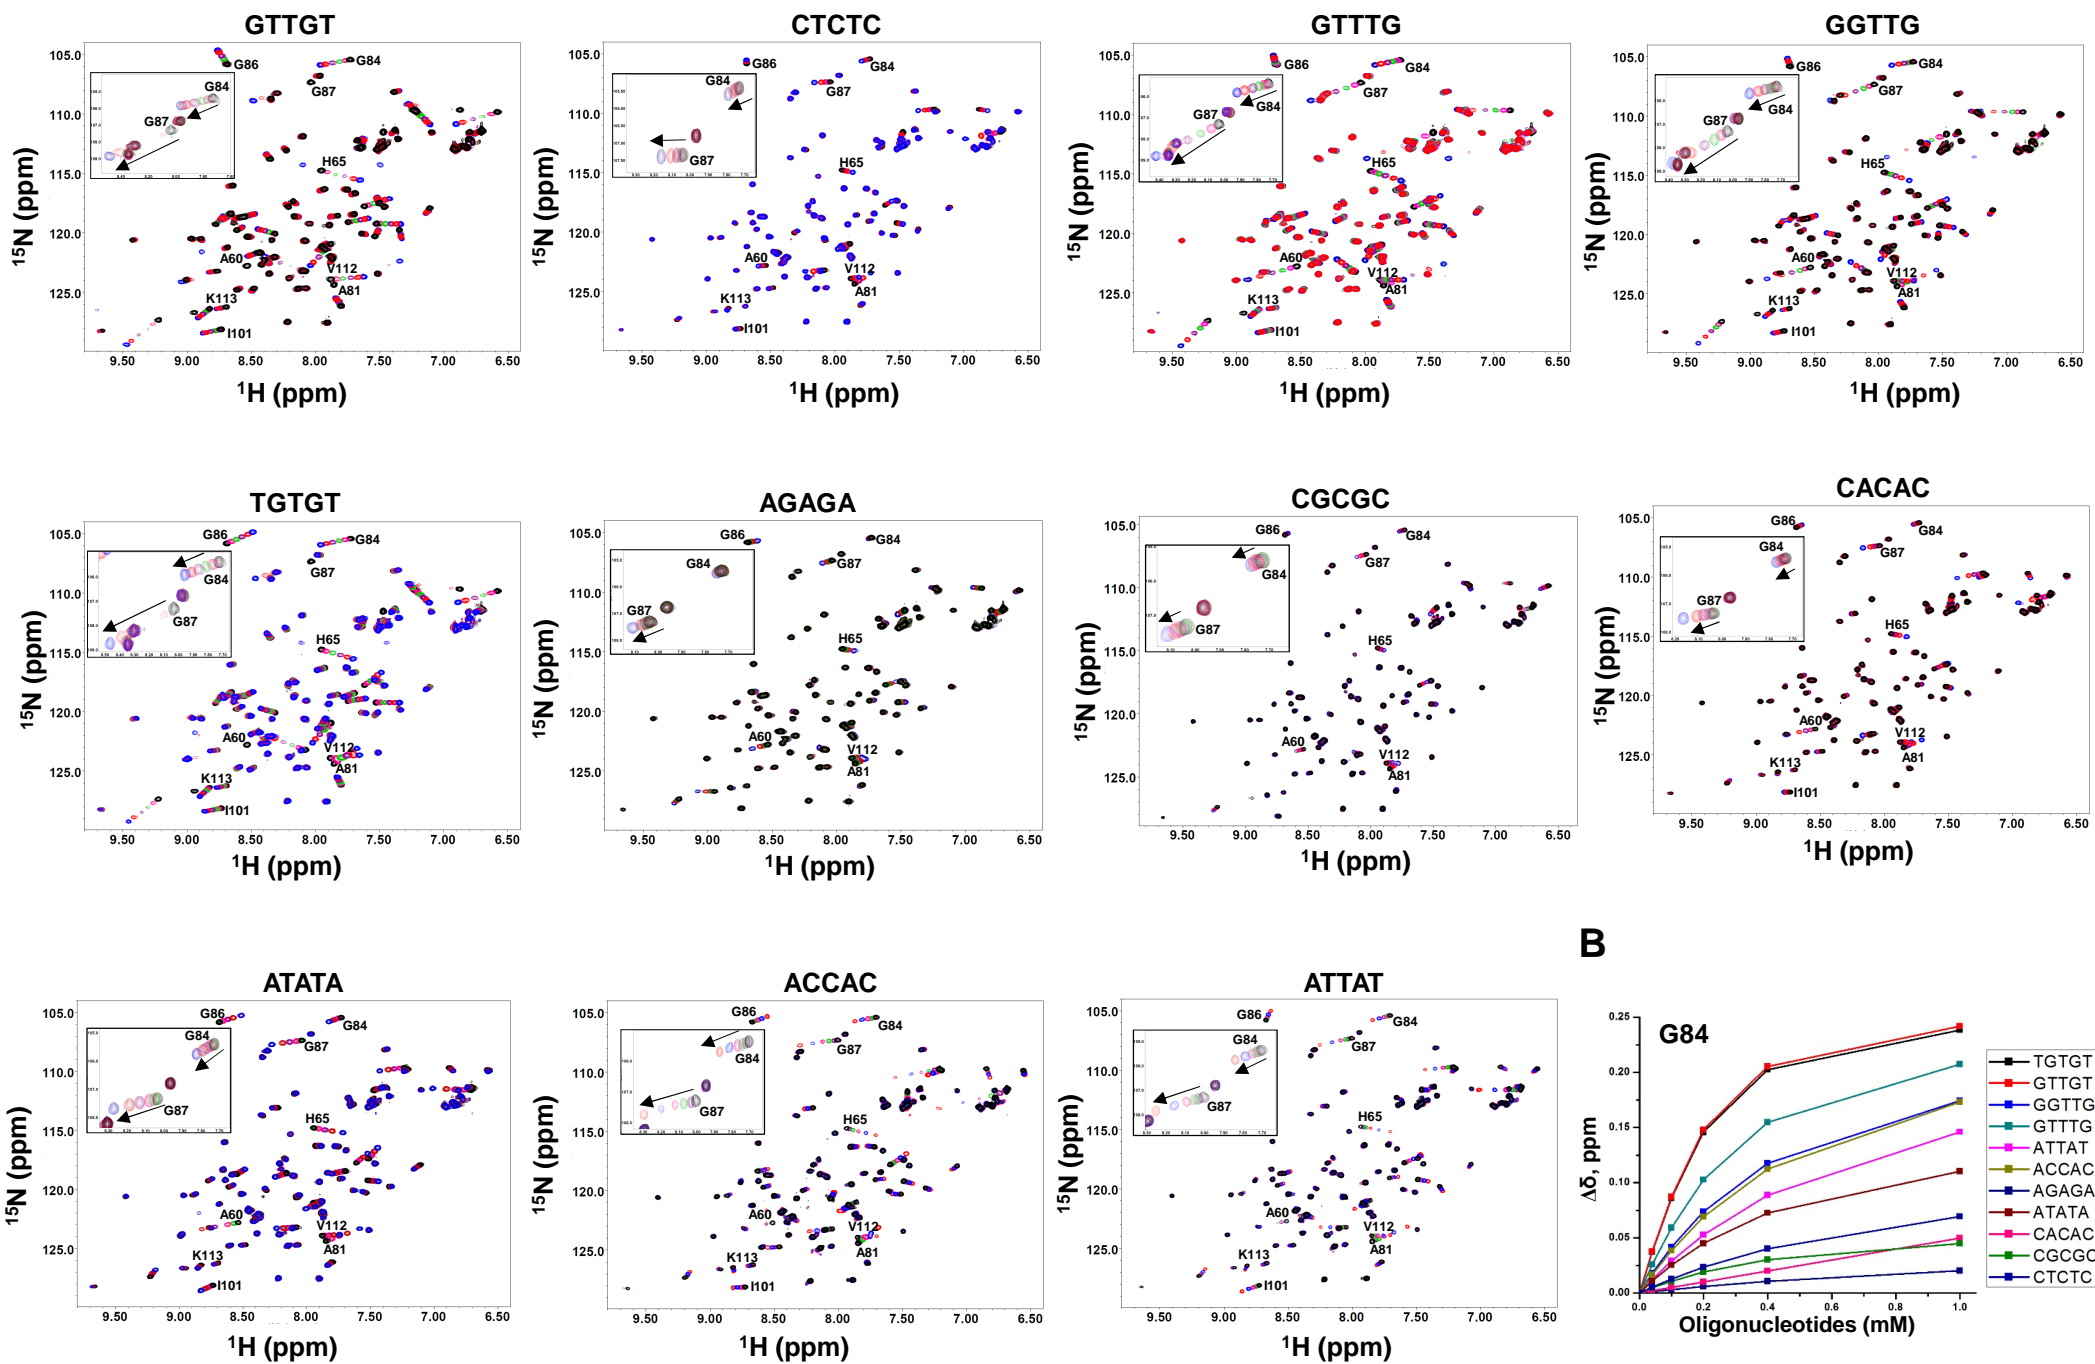

**Figure S12.**  $^1\text{H}$ - $^{15}\text{N}$  HSQC spectrum of the DDX43 KH-89 protein with indicated oligonucleotide (ranged 40-1000  $\mu\text{M}$ ). (A)  $^1\text{H}$ - $^{15}\text{N}$  HSQC spectrum of the DDX43-KH-89 protein (200  $\mu\text{M}$ ) with the indicated oligonucleotide (ranged 40-1000  $\mu\text{M}$ ). Insets show the enlarged view of the chemical shifts for residues G84 and G87. (B) Combined chemical shift change ( $\Delta\delta$ ) plotted as a function of different oligonucleotides concentration (0.0-1000  $\mu\text{M}$ ) at 200  $\mu\text{M}$  DDX43 KH-89 protein for residue G84.

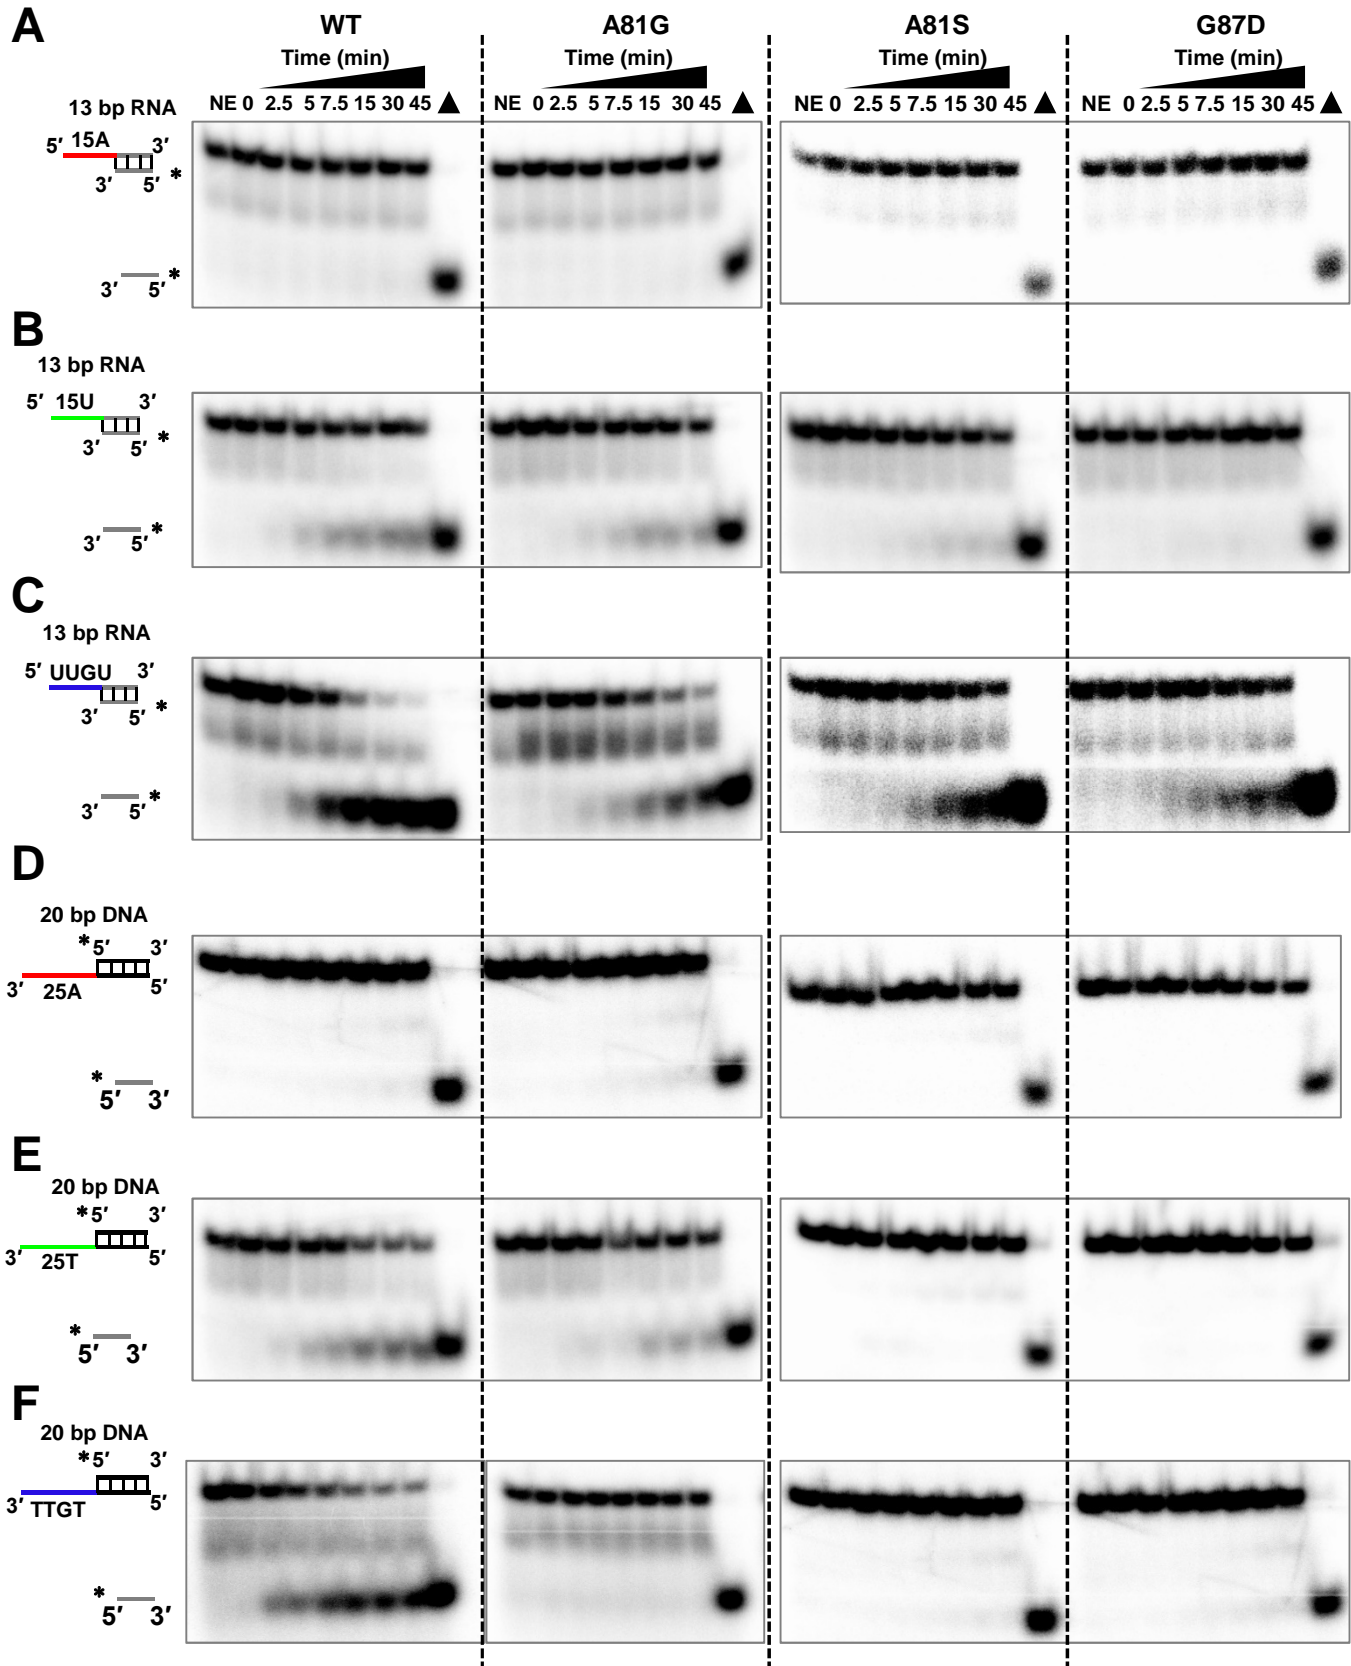

**Figure S13. Representative images of helicase kinetic time course assays.** DDX43 protein (WT, A81G, A81S or G87D, 2  $\mu$ M) was incubated with 0.5 nM of 13-bp duplex RNA with 5' tail of polyA (A), polyU (B), UUGU repeats (C), or 20-bp duplex DNA with 5' tail of polyA (D), polyT (E), TTGT repeats (F), for 0, 2.5, 5, 7.5, 15, 30, and 45 min. NE, no enzyme. The triangle indicates heat denatured RNA or DNA substrate control.

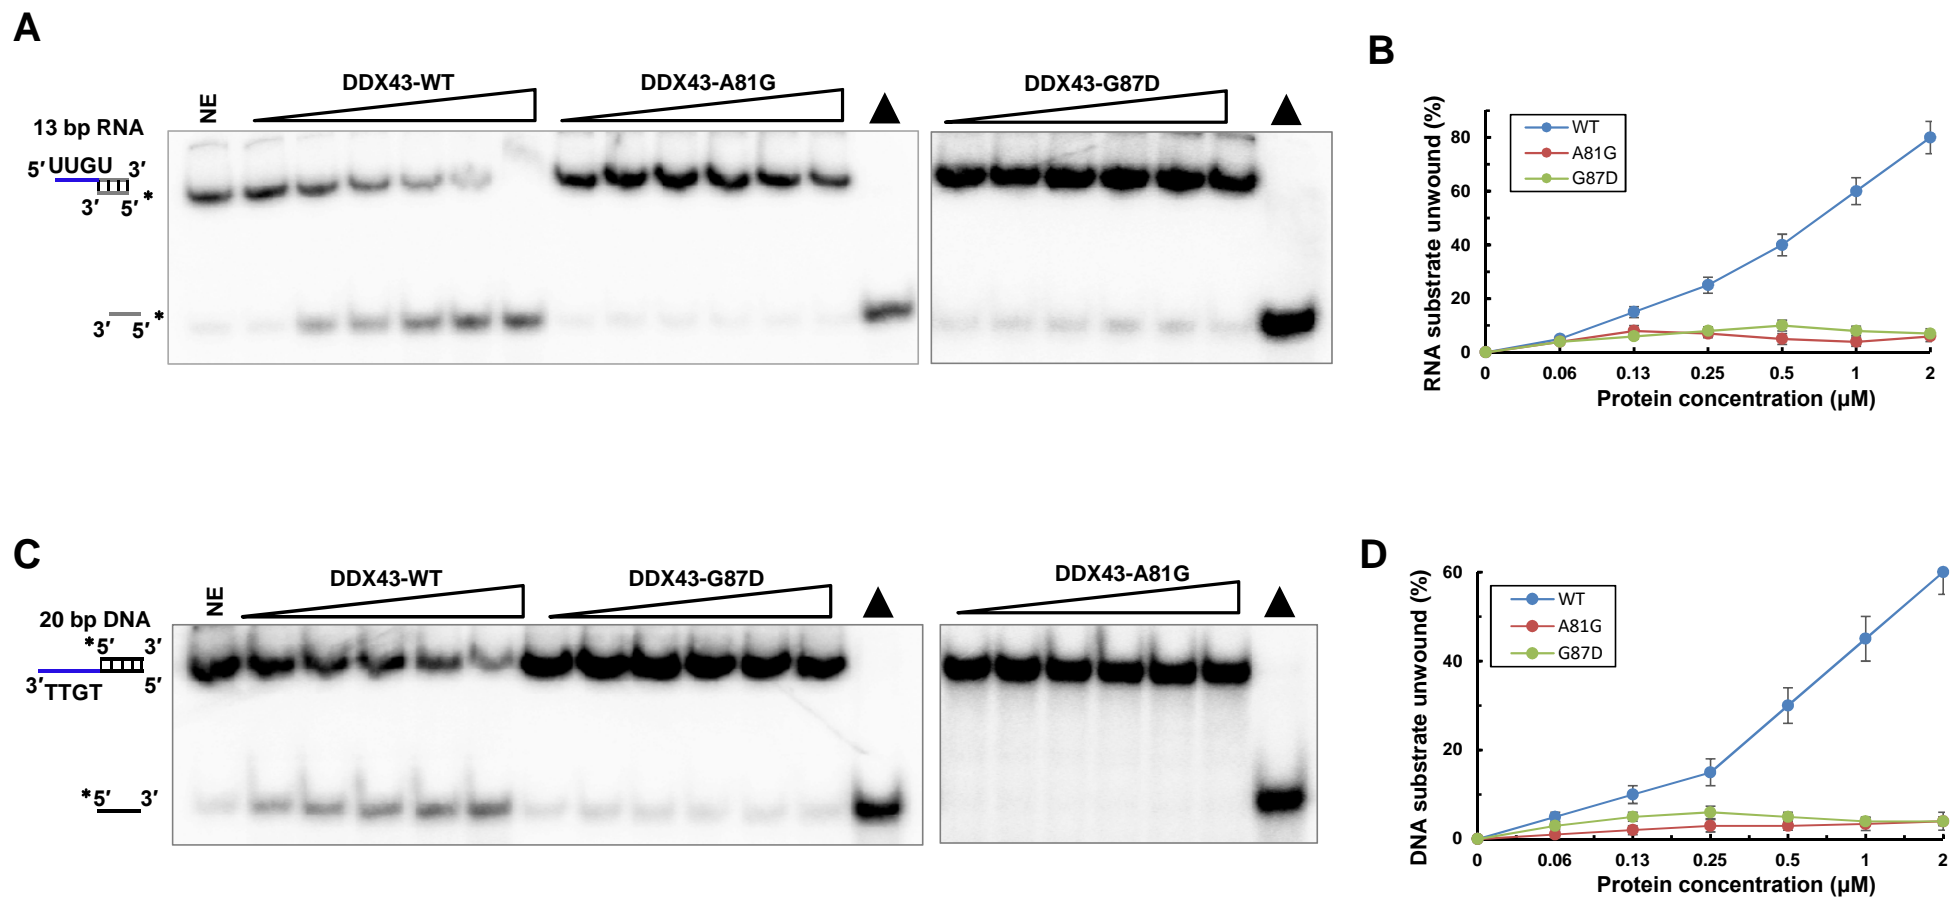

**Figure S14. Mutated alanine (A81) or glycine (G87) affects DDX43 in unwinding processivity.** (A and C) Representative images of helicase reactions performed by incubating 0.5 nM of 13-bp duplex RNA with 5' tail of UUGU repeats (A) or 20-bp duplex DNA with 3' tail of TTGT repeats (C) with increasing protein concentrations (0–2 µM) at 37 °C for 15 min. (B and D) Quantitative analysis of A and C respectively. NE, no enzyme; filled triangle, heated sample. Data are presented as mean  $\pm$  S.D, n = 3.

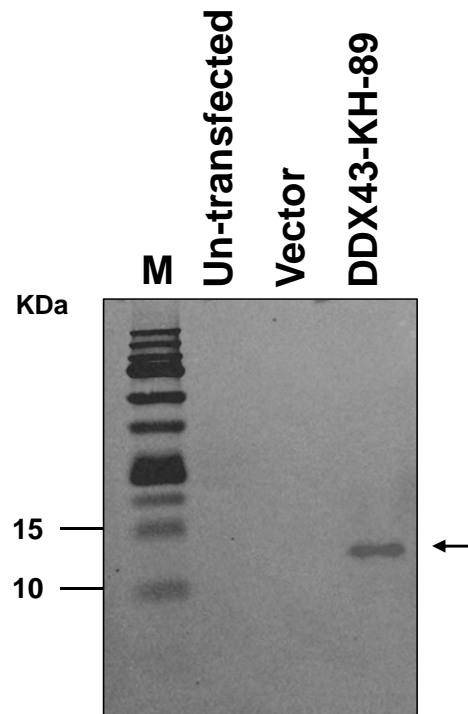

Figure S15. Western blot analysis of DDX43-KH-89 expression in HEK293T cells using an anti-FLAG antibody. M, marker.
